# Supplementary material for: Exploring Options for Syndromic Surveillance in Aquaculture: Outbreak Detection of Salmon Pancreas Disease Using Production Data from Norwegian Farms
Source: Hindawi journal article supplement (doi:10.1155/2024/9861677), 2024-01-01
Supplement: f1 [file 9861677.f1.pdf]

| Parameter           | parameter_setting | Zone | TP  | FP   | TN   | FN  | FAR    | TPR(Se) | TNR(Sp) | PPV    | NPV    |
|---------------------|-------------------|------|-----|------|------|-----|--------|---------|---------|--------|--------|
| baseline.correction | FALSE             | 3    | 504 | 998  | 1118 | 68  | 0.4716 | 0.8811  | 0.5284  | 0.3356 | 0.9427 |
| baseline.correction | TRUE              | 3    | 510 | 1048 | 1068 | 62  | 0.4953 | 0.8916  | 0.5047  | 0.3273 | 0.9451 |
| Model               | 1                 | 3    | 511 | 1152 | 964  | 61  | 0.5444 | 0.8934  | 0.4556  | 0.3073 | 0.9405 |
| Model               | 2                 | 3    | 516 | 1052 | 1064 | 56  | 0.4972 | 0.9021  | 0.5028  | 0.3291 | 0.9500 |
| Model               | 3                 | 3    | 516 | 1049 | 1067 | 56  | 0.4957 | 0.9021  | 0.5043  | 0.3297 | 0.9501 |
| Model               | 4                 | 3    | 515 | 1048 | 1068 | 57  | 0.4953 | 0.9003  | 0.5047  | 0.3295 | 0.9493 |
| Model               | 5                 | 3    | 510 | 1048 | 1068 | 62  | 0.4953 | 0.8916  | 0.5047  | 0.3273 | 0.9451 |
| Model               | 6                 | 3    | 510 | 1048 | 1068 | 62  | 0.4953 | 0.8916  | 0.5047  | 0.3273 | 0.9451 |
| Model               | 7                 | 3    | 507 | 1047 | 1069 | 65  | 0.4948 | 0.8864  | 0.5052  | 0.3263 | 0.9427 |
| Model               | 8                 | 3    | 507 | 1047 | 1069 | 65  | 0.4948 | 0.8864  | 0.5052  | 0.3263 | 0.9427 |
| Model               | no_model          | 3    | 444 | 588  | 1528 | 128 | 0.2779 | 0.7762  | 0.7221  | 0.4302 | 0.9227 |
| MR_cutoff           | 0.003             | 3    | 530 | 1215 | 901  | 42  | 0.5742 | 0.9266  | 0.4258  | 0.3037 | 0.9555 |
| MR_cutoff           | 0.004             | 3    | 517 | 1113 | 1003 | 55  | 0.5260 | 0.9038  | 0.4740  | 0.3172 | 0.9480 |
| MR_cutoff           | 0.005             | 3    | 510 | 1048 | 1068 | 62  | 0.4953 | 0.8916  | 0.5047  | 0.3273 | 0.9451 |
| MR_cutoff           | 0.006             | 3    | 497 | 980  | 1136 | 75  | 0.4631 | 0.8689  | 0.5369  | 0.3365 | 0.9381 |
| MR_cutoff           | 0.007             | 3    | 488 | 913  | 1203 | 84  | 0.4315 | 0.8531  | 0.5685  | 0.3483 | 0.9347 |
| MR_cutoff           | 0.008             | 3    | 476 | 867  | 1249 | 96  | 0.4097 | 0.8322  | 0.5903  | 0.3544 | 0.9286 |
| MR_cutoff           | 0.009             | 3    | 455 | 821  | 1295 | 117 | 0.3880 | 0.7955  | 0.6120  | 0.3566 | 0.9171 |
| MR_cutoff           | 0.01              | 3    | 442 | 766  | 1350 | 130 | 0.3620 | 0.7727  | 0.6380  | 0.3659 | 0.9122 |
| MR_cutoff           | 0.011             | 3    | 431 | 742  | 1374 | 141 | 0.3507 | 0.7535  | 0.6493  | 0.3674 | 0.9069 |
| MR_cutoff           | 0.012             | 3    | 414 | 710  | 1406 | 158 | 0.3355 | 0.7238  | 0.6645  | 0.3683 | 0.8990 |
| MR_cutoff           | 0.013             | 3    | 405 | 691  | 1425 | 167 | 0.3266 | 0.7080  | 0.6734  | 0.3695 | 0.8951 |
| MR_cutoff           | 0.014             | 3    | 395 | 668  | 1448 | 177 | 0.3157 | 0.6906  | 0.6843  | 0.3716 | 0.8911 |
| MR_cutoff           | 0.015             | 3    | 380 | 649  | 1467 | 192 | 0.3067 | 0.6643  | 0.6933  | 0.3693 | 0.8843 |
| MR_cutoff           | 0.016             | 3    | 361 | 627  | 1489 | 211 | 0.2963 | 0.6311  | 0.7037  | 0.3654 | 0.8759 |
| MR_cutoff           | 0.017             | 3    | 354 | 608  | 1508 | 218 | 0.2873 | 0.6189  | 0.7127  | 0.3680 | 0.8737 |
| MR_cutoff           | 0.018             | 3    | 346 | 582  | 1534 | 226 | 0.2750 | 0.6049  | 0.7250  | 0.3728 | 0.8716 |
| MR_cutoff           | 0.019             | 3    | 343 | 569  | 1547 | 229 | 0.2689 | 0.5997  | 0.7311  | 0.3761 | 0.8711 |
| MR_cutoff           | 0.02              | 3    | 339 | 561  | 1555 | 233 | 0.2651 | 0.5927  | 0.7349  | 0.3767 | 0.8697 |
| MR_cutoff           | 0.021             | 3    | 329 | 546  | 1570 | 243 | 0.2580 | 0.5752  | 0.7420  | 0.3760 | 0.8660 |
| MR_cutoff           | 0.022             | 3    | 325 | 541  | 1575 | 247 | 0.2557 | 0.5682  | 0.7443  | 0.3753 | 0.8644 |
| MR_cutoff           | 0.023             | 3    | 322 | 531  | 1585 | 250 | 0.2509 | 0.5629  | 0.7491  | 0.3775 | 0.8638 |
| MR_cutoff           | 0.024             | 3    | 312 | 509  | 1607 | 260 | 0.2405 | 0.5455  | 0.7595  | 0.3800 | 0.8607 |
| MR_cutoff           | 0.025             | 3    | 299 | 501  | 1615 | 273 | 0.2368 | 0.5227  | 0.7632  | 0.3738 | 0.8554 |

|               |       |   |     |      |      |     |        |        |        |        |        |
|---------------|-------|---|-----|------|------|-----|--------|--------|--------|--------|--------|
| MR_cutoff     | 0.026 | 3 | 301 | 492  | 1624 | 271 | 0.2325 | 0.5262 | 0.7675 | 0.3796 | 0.8570 |
| MR_cutoff     | 0.027 | 3 | 298 | 486  | 1630 | 274 | 0.2297 | 0.5210 | 0.7703 | 0.3801 | 0.8561 |
| MR_cutoff     | 0.028 | 3 | 294 | 476  | 1640 | 278 | 0.2250 | 0.5140 | 0.7750 | 0.3818 | 0.8551 |
| MR_cutoff     | 0.029 | 3 | 281 | 458  | 1658 | 291 | 0.2164 | 0.4913 | 0.7836 | 0.3802 | 0.8507 |
| MR_cutoff     | 0.03  | 3 | 279 | 444  | 1672 | 293 | 0.2098 | 0.4878 | 0.7902 | 0.3859 | 0.8509 |
| MR_cutoff     | 0.031 | 3 | 282 | 437  | 1679 | 290 | 0.2065 | 0.4930 | 0.7935 | 0.3922 | 0.8527 |
| MR_cutoff     | 0.032 | 3 | 272 | 434  | 1682 | 300 | 0.2051 | 0.4755 | 0.7949 | 0.3853 | 0.8486 |
| MR_cutoff     | 0.033 | 3 | 268 | 432  | 1684 | 304 | 0.2042 | 0.4685 | 0.7958 | 0.3829 | 0.8471 |
| MR_cutoff     | 0.034 | 3 | 263 | 419  | 1697 | 309 | 0.1980 | 0.4598 | 0.8020 | 0.3856 | 0.8460 |
| MR_cutoff     | 0.035 | 3 | 259 | 421  | 1695 | 313 | 0.1990 | 0.4528 | 0.8010 | 0.3809 | 0.8441 |
| MR_cutoff     | 0.036 | 3 | 259 | 406  | 1710 | 313 | 0.1919 | 0.4528 | 0.8081 | 0.3895 | 0.8453 |
| MR_cutoff     | 0.037 | 3 | 259 | 397  | 1719 | 313 | 0.1876 | 0.4528 | 0.8124 | 0.3948 | 0.8460 |
| MR_cutoff     | 0.038 | 3 | 253 | 396  | 1720 | 319 | 0.1871 | 0.4423 | 0.8129 | 0.3898 | 0.8436 |
| MR_cutoff     | 0.039 | 3 | 250 | 389  | 1727 | 322 | 0.1838 | 0.4371 | 0.8162 | 0.3912 | 0.8429 |
| MR_cutoff     | 0.04  | 3 | 250 | 386  | 1730 | 322 | 0.1824 | 0.4371 | 0.8176 | 0.3931 | 0.8431 |
| MR_cutoff     | 0.041 | 3 | 248 | 385  | 1731 | 324 | 0.1819 | 0.4336 | 0.8181 | 0.3918 | 0.8423 |
| MR_cutoff     | 0.042 | 3 | 247 | 384  | 1732 | 325 | 0.1815 | 0.4318 | 0.8185 | 0.3914 | 0.8420 |
| MR_cutoff     | 0.043 | 3 | 246 | 381  | 1735 | 326 | 0.1801 | 0.4301 | 0.8199 | 0.3923 | 0.8418 |
| MR_cutoff     | 0.044 | 3 | 242 | 380  | 1736 | 330 | 0.1796 | 0.4231 | 0.8204 | 0.3891 | 0.8403 |
| MR_cutoff     | 0.045 | 3 | 241 | 376  | 1740 | 331 | 0.1777 | 0.4213 | 0.8223 | 0.3906 | 0.8402 |
| MR_cutoff     | 0.046 | 3 | 238 | 380  | 1736 | 334 | 0.1796 | 0.4161 | 0.8204 | 0.3851 | 0.8386 |
| MR_cutoff     | 0.047 | 3 | 244 | 379  | 1737 | 328 | 0.1791 | 0.4266 | 0.8209 | 0.3917 | 0.8412 |
| MR_cutoff     | 0.048 | 3 | 238 | 379  | 1737 | 334 | 0.1791 | 0.4161 | 0.8209 | 0.3857 | 0.8387 |
| MR_cutoff     | 0.049 | 3 | 238 | 379  | 1737 | 334 | 0.1791 | 0.4161 | 0.8209 | 0.3857 | 0.8387 |
| MR_cutoff     | 0.05  | 3 | 240 | 375  | 1741 | 332 | 0.1772 | 0.4196 | 0.8228 | 0.3902 | 0.8398 |
| N_aberrations | 1     | 3 | 553 | 1697 | 451  | 19  | 0.7900 | 0.9668 | 0.2100 | 0.2458 | 0.9596 |
| N_aberrations | 2     | 3 | 534 | 1328 | 812  | 38  | 0.6206 | 0.9336 | 0.3794 | 0.2868 | 0.9553 |
| N_aberrations | 3     | 3 | 510 | 1048 | 1068 | 62  | 0.4953 | 0.8916 | 0.5047 | 0.3273 | 0.9451 |
| N_aberrations | 4     | 3 | 476 | 835  | 1245 | 93  | 0.4014 | 0.8366 | 0.5986 | 0.3631 | 0.9305 |
| N_aberrations | 5     | 3 | 434 | 657  | 1387 | 135 | 0.3214 | 0.7627 | 0.6786 | 0.3978 | 0.9113 |
| N_aberrations | 6     | 3 | 385 | 517  | 1487 | 184 | 0.2580 | 0.6766 | 0.7420 | 0.4268 | 0.8899 |
| UCL           | 0.05  | 3 | 560 | 1639 | 477  | 12  | 0.7746 | 0.9790 | 0.2254 | 0.2547 | 0.9755 |
| UCL           | 0.1   | 3 | 558 | 1621 | 495  | 14  | 0.7661 | 0.9755 | 0.2339 | 0.2561 | 0.9725 |
| UCL           | 0.15  | 3 | 557 | 1573 | 543  | 15  | 0.7434 | 0.9738 | 0.2566 | 0.2615 | 0.9731 |
| UCL           | 0.2   | 3 | 554 | 1487 | 629  | 18  | 0.7027 | 0.9685 | 0.2973 | 0.2714 | 0.9722 |

|                     |          |   |     |      |      |     |        |        |        |        |        |
|---------------------|----------|---|-----|------|------|-----|--------|--------|--------|--------|--------|
| UCL                 | 0.25     | 3 | 547 | 1385 | 731  | 25  | 0.6545 | 0.9563 | 0.3455 | 0.2831 | 0.9669 |
| UCL                 | 0.3      | 3 | 538 | 1284 | 832  | 34  | 0.6068 | 0.9406 | 0.3932 | 0.2953 | 0.9607 |
| UCL                 | 0.35     | 3 | 529 | 1219 | 897  | 43  | 0.5761 | 0.9248 | 0.4239 | 0.3026 | 0.9543 |
| UCL                 | 0.4      | 3 | 527 | 1152 | 964  | 45  | 0.5444 | 0.9213 | 0.4556 | 0.3139 | 0.9554 |
| UCL                 | 0.45     | 3 | 513 | 1083 | 1033 | 59  | 0.5118 | 0.8969 | 0.4882 | 0.3214 | 0.9460 |
| UCL                 | 0.5      | 3 | 510 | 1048 | 1068 | 62  | 0.4953 | 0.8916 | 0.5047 | 0.3273 | 0.9451 |
| UCL                 | 0.55     | 3 | 500 | 993  | 1123 | 72  | 0.4693 | 0.8741 | 0.5307 | 0.3349 | 0.9397 |
| UCL                 | 0.6      | 3 | 488 | 927  | 1189 | 84  | 0.4381 | 0.8531 | 0.5619 | 0.3449 | 0.9340 |
| UCL                 | 0.65     | 3 | 476 | 858  | 1258 | 96  | 0.4055 | 0.8322 | 0.5945 | 0.3568 | 0.9291 |
| UCL                 | 0.7      | 3 | 458 | 780  | 1336 | 114 | 0.3686 | 0.8007 | 0.6314 | 0.3700 | 0.9214 |
| UCL                 | 0.75     | 3 | 441 | 717  | 1399 | 131 | 0.3388 | 0.7710 | 0.6612 | 0.3808 | 0.9144 |
| UCL                 | 0.8      | 3 | 426 | 645  | 1471 | 146 | 0.3048 | 0.7448 | 0.6952 | 0.3978 | 0.9097 |
| UCL                 | 0.85     | 3 | 411 | 577  | 1539 | 161 | 0.2727 | 0.7185 | 0.7273 | 0.4160 | 0.9053 |
| UCL                 | 0.9      | 3 | 394 | 535  | 1581 | 178 | 0.2528 | 0.6888 | 0.7472 | 0.4241 | 0.8988 |
| UCL                 | 0.95     | 3 | 387 | 521  | 1595 | 185 | 0.2462 | 0.6766 | 0.7538 | 0.4262 | 0.8961 |
| baseline.correction | FALSE    | 4 | 583 | 576  | 681  | 106 | 0.4582 | 0.8462 | 0.5418 | 0.5030 | 0.8653 |
| baseline.correction | TRUE     | 4 | 588 | 601  | 656  | 101 | 0.4781 | 0.8534 | 0.5219 | 0.4945 | 0.8666 |
| Model               | 1        | 4 | 568 | 611  | 646  | 121 | 0.4861 | 0.8244 | 0.5139 | 0.4818 | 0.8422 |
| Model               | 2        | 4 | 595 | 606  | 651  | 94  | 0.4821 | 0.8636 | 0.5179 | 0.4954 | 0.8738 |
| Model               | 3        | 4 | 591 | 607  | 650  | 98  | 0.4829 | 0.8578 | 0.5171 | 0.4933 | 0.8690 |
| Model               | 4        | 4 | 590 | 596  | 661  | 99  | 0.4741 | 0.8563 | 0.5259 | 0.4975 | 0.8697 |
| Model               | 5        | 4 | 588 | 601  | 656  | 101 | 0.4781 | 0.8534 | 0.5219 | 0.4945 | 0.8666 |
| Model               | 6        | 4 | 588 | 601  | 656  | 101 | 0.4781 | 0.8534 | 0.5219 | 0.4945 | 0.8666 |
| Model               | 7        | 4 | 590 | 595  | 662  | 99  | 0.4733 | 0.8563 | 0.5267 | 0.4979 | 0.8699 |
| Model               | 8        | 4 | 590 | 593  | 664  | 99  | 0.4718 | 0.8563 | 0.5282 | 0.4987 | 0.8702 |
| Model               | no_model | 4 | 509 | 353  | 904  | 180 | 0.2808 | 0.7388 | 0.7192 | 0.5905 | 0.8339 |
| MR_cutoff           | 0.003    | 4 | 614 | 701  | 556  | 75  | 0.5577 | 0.8911 | 0.4423 | 0.4669 | 0.8811 |
| MR_cutoff           | 0.004    | 4 | 599 | 642  | 615  | 90  | 0.5107 | 0.8694 | 0.4893 | 0.4827 | 0.8723 |
| MR_cutoff           | 0.005    | 4 | 588 | 601  | 656  | 101 | 0.4781 | 0.8534 | 0.5219 | 0.4945 | 0.8666 |
| MR_cutoff           | 0.006    | 4 | 575 | 567  | 690  | 114 | 0.4511 | 0.8345 | 0.5489 | 0.5035 | 0.8582 |
| MR_cutoff           | 0.007    | 4 | 564 | 539  | 718  | 125 | 0.4288 | 0.8186 | 0.5712 | 0.5113 | 0.8517 |
| MR_cutoff           | 0.008    | 4 | 545 | 526  | 731  | 144 | 0.4185 | 0.7910 | 0.5815 | 0.5089 | 0.8354 |
| MR_cutoff           | 0.009    | 4 | 540 | 507  | 750  | 149 | 0.4033 | 0.7837 | 0.5967 | 0.5158 | 0.8343 |
| MR_cutoff           | 0.01     | 4 | 523 | 476  | 781  | 166 | 0.3787 | 0.7591 | 0.6213 | 0.5235 | 0.8247 |
| MR_cutoff           | 0.011    | 4 | 515 | 462  | 795  | 174 | 0.3675 | 0.7475 | 0.6325 | 0.5271 | 0.8204 |

|           |       |   |     |     |     |     |        |        |        |        |        |
|-----------|-------|---|-----|-----|-----|-----|--------|--------|--------|--------|--------|
| MR_cutoff | 0.012 | 4 | 505 | 445 | 812 | 184 | 0.3540 | 0.7329 | 0.6460 | 0.5316 | 0.8153 |
| MR_cutoff | 0.013 | 4 | 493 | 421 | 836 | 196 | 0.3349 | 0.7155 | 0.6651 | 0.5394 | 0.8101 |
| MR_cutoff | 0.014 | 4 | 488 | 416 | 841 | 201 | 0.3309 | 0.7083 | 0.6691 | 0.5398 | 0.8071 |
| MR_cutoff | 0.015 | 4 | 477 | 404 | 853 | 212 | 0.3214 | 0.6923 | 0.6786 | 0.5414 | 0.8009 |
| MR_cutoff | 0.016 | 4 | 469 | 392 | 865 | 220 | 0.3119 | 0.6807 | 0.6881 | 0.5447 | 0.7972 |
| MR_cutoff | 0.017 | 4 | 463 | 384 | 873 | 226 | 0.3055 | 0.6720 | 0.6945 | 0.5466 | 0.7944 |
| MR_cutoff | 0.018 | 4 | 444 | 370 | 887 | 245 | 0.2944 | 0.6444 | 0.7056 | 0.5455 | 0.7836 |
| MR_cutoff | 0.019 | 4 | 432 | 365 | 892 | 257 | 0.2904 | 0.6270 | 0.7096 | 0.5420 | 0.7763 |
| MR_cutoff | 0.02  | 4 | 417 | 357 | 900 | 272 | 0.2840 | 0.6052 | 0.7160 | 0.5388 | 0.7679 |
| MR_cutoff | 0.021 | 4 | 410 | 352 | 905 | 279 | 0.2800 | 0.5951 | 0.7200 | 0.5381 | 0.7644 |
| MR_cutoff | 0.022 | 4 | 405 | 348 | 909 | 284 | 0.2768 | 0.5878 | 0.7232 | 0.5378 | 0.7619 |
| MR_cutoff | 0.023 | 4 | 406 | 345 | 912 | 283 | 0.2745 | 0.5893 | 0.7255 | 0.5406 | 0.7632 |
| MR_cutoff | 0.024 | 4 | 402 | 339 | 918 | 287 | 0.2697 | 0.5835 | 0.7303 | 0.5425 | 0.7618 |
| MR_cutoff | 0.025 | 4 | 398 | 340 | 917 | 291 | 0.2705 | 0.5776 | 0.7295 | 0.5393 | 0.7591 |
| MR_cutoff | 0.026 | 4 | 379 | 325 | 932 | 310 | 0.2586 | 0.5501 | 0.7414 | 0.5384 | 0.7504 |
| MR_cutoff | 0.027 | 4 | 369 | 322 | 935 | 320 | 0.2562 | 0.5356 | 0.7438 | 0.5340 | 0.7450 |
| MR_cutoff | 0.028 | 4 | 362 | 313 | 944 | 327 | 0.2490 | 0.5254 | 0.7510 | 0.5363 | 0.7427 |
| MR_cutoff | 0.029 | 4 | 359 | 309 | 948 | 330 | 0.2458 | 0.5210 | 0.7542 | 0.5374 | 0.7418 |
| MR_cutoff | 0.03  | 4 | 353 | 304 | 953 | 336 | 0.2418 | 0.5123 | 0.7582 | 0.5373 | 0.7393 |
| MR_cutoff | 0.031 | 4 | 351 | 303 | 954 | 338 | 0.2411 | 0.5094 | 0.7589 | 0.5367 | 0.7384 |
| MR_cutoff | 0.032 | 4 | 346 | 298 | 959 | 343 | 0.2371 | 0.5022 | 0.7629 | 0.5373 | 0.7366 |
| MR_cutoff | 0.033 | 4 | 345 | 296 | 961 | 344 | 0.2355 | 0.5007 | 0.7645 | 0.5382 | 0.7364 |
| MR_cutoff | 0.034 | 4 | 343 | 297 | 960 | 346 | 0.2363 | 0.4978 | 0.7637 | 0.5359 | 0.7351 |
| MR_cutoff | 0.035 | 4 | 341 | 294 | 963 | 348 | 0.2339 | 0.4949 | 0.7661 | 0.5370 | 0.7346 |
| MR_cutoff | 0.036 | 4 | 341 | 291 | 966 | 348 | 0.2315 | 0.4949 | 0.7685 | 0.5396 | 0.7352 |
| MR_cutoff | 0.037 | 4 | 337 | 287 | 970 | 352 | 0.2283 | 0.4891 | 0.7717 | 0.5401 | 0.7337 |
| MR_cutoff | 0.038 | 4 | 337 | 282 | 975 | 352 | 0.2243 | 0.4891 | 0.7757 | 0.5444 | 0.7347 |
| MR_cutoff | 0.039 | 4 | 335 | 280 | 977 | 354 | 0.2228 | 0.4862 | 0.7772 | 0.5447 | 0.7340 |
| MR_cutoff | 0.04  | 4 | 334 | 278 | 979 | 355 | 0.2212 | 0.4848 | 0.7788 | 0.5458 | 0.7339 |
| MR_cutoff | 0.041 | 4 | 330 | 278 | 979 | 359 | 0.2212 | 0.4790 | 0.7788 | 0.5428 | 0.7317 |
| MR_cutoff | 0.042 | 4 | 323 | 269 | 988 | 366 | 0.2140 | 0.4688 | 0.7860 | 0.5456 | 0.7297 |
| MR_cutoff | 0.043 | 4 | 322 | 269 | 988 | 367 | 0.2140 | 0.4673 | 0.7860 | 0.5448 | 0.7292 |
| MR_cutoff | 0.044 | 4 | 321 | 267 | 990 | 368 | 0.2124 | 0.4659 | 0.7876 | 0.5459 | 0.7290 |
| MR_cutoff | 0.045 | 4 | 320 | 267 | 990 | 369 | 0.2124 | 0.4644 | 0.7876 | 0.5451 | 0.7285 |
| MR_cutoff | 0.046 | 4 | 316 | 264 | 993 | 373 | 0.2100 | 0.4586 | 0.7900 | 0.5448 | 0.7269 |

|                     |       |   |     |      |     |     |        |        |        |        |        |
|---------------------|-------|---|-----|------|-----|-----|--------|--------|--------|--------|--------|
| MR_cutoff           | 0.047 | 4 | 316 | 261  | 996 | 373 | 0.2076 | 0.4586 | 0.7924 | 0.5477 | 0.7275 |
| MR_cutoff           | 0.048 | 4 | 312 | 260  | 997 | 377 | 0.2068 | 0.4528 | 0.7932 | 0.5455 | 0.7256 |
| MR_cutoff           | 0.049 | 4 | 312 | 260  | 997 | 377 | 0.2068 | 0.4528 | 0.7932 | 0.5455 | 0.7256 |
| MR_cutoff           | 0.05  | 4 | 312 | 259  | 998 | 377 | 0.2060 | 0.4528 | 0.7940 | 0.5464 | 0.7258 |
| N_aberrations       | 1     | 4 | 662 | 1017 | 266 | 28  | 0.7927 | 0.9594 | 0.2073 | 0.3943 | 0.9048 |
| N_aberrations       | 2     | 4 | 629 | 777  | 498 | 60  | 0.6094 | 0.9129 | 0.3906 | 0.4474 | 0.8925 |
| N_aberrations       | 3     | 4 | 588 | 601  | 656 | 101 | 0.4781 | 0.8534 | 0.5219 | 0.4945 | 0.8666 |
| N_aberrations       | 4     | 4 | 540 | 468  | 776 | 147 | 0.3762 | 0.7860 | 0.6238 | 0.5357 | 0.8407 |
| N_aberrations       | 5     | 4 | 487 | 358  | 860 | 198 | 0.2939 | 0.7109 | 0.7061 | 0.5763 | 0.8129 |
| N_aberrations       | 6     | 4 | 433 | 269  | 929 | 252 | 0.2245 | 0.6321 | 0.7755 | 0.6168 | 0.7866 |
| UCL                 | 0.05  | 4 | 663 | 934  | 323 | 26  | 0.7430 | 0.9623 | 0.2570 | 0.4152 | 0.9255 |
| UCL                 | 0.1   | 4 | 663 | 917  | 340 | 26  | 0.7295 | 0.9623 | 0.2705 | 0.4196 | 0.9290 |
| UCL                 | 0.15  | 4 | 663 | 879  | 378 | 26  | 0.6993 | 0.9623 | 0.3007 | 0.4300 | 0.9356 |
| UCL                 | 0.2   | 4 | 651 | 826  | 431 | 38  | 0.6571 | 0.9448 | 0.3429 | 0.4408 | 0.9190 |
| UCL                 | 0.25  | 4 | 637 | 788  | 469 | 52  | 0.6269 | 0.9245 | 0.3731 | 0.4470 | 0.9002 |
| UCL                 | 0.3   | 4 | 622 | 750  | 507 | 67  | 0.5967 | 0.9028 | 0.4033 | 0.4534 | 0.8833 |
| UCL                 | 0.35  | 4 | 613 | 703  | 554 | 76  | 0.5593 | 0.8897 | 0.4407 | 0.4658 | 0.8794 |
| UCL                 | 0.4   | 4 | 600 | 665  | 592 | 89  | 0.5290 | 0.8708 | 0.4710 | 0.4743 | 0.8693 |
| UCL                 | 0.45  | 4 | 589 | 622  | 635 | 100 | 0.4948 | 0.8549 | 0.5052 | 0.4864 | 0.8639 |
| UCL                 | 0.5   | 4 | 588 | 601  | 656 | 101 | 0.4781 | 0.8534 | 0.5219 | 0.4945 | 0.8666 |
| UCL                 | 0.55  | 4 | 582 | 569  | 688 | 107 | 0.4527 | 0.8447 | 0.5473 | 0.5056 | 0.8654 |
| UCL                 | 0.6   | 4 | 562 | 543  | 714 | 127 | 0.4320 | 0.8157 | 0.5680 | 0.5086 | 0.8490 |
| UCL                 | 0.65  | 4 | 542 | 512  | 745 | 147 | 0.4073 | 0.7866 | 0.5927 | 0.5142 | 0.8352 |
| UCL                 | 0.7   | 4 | 529 | 480  | 777 | 160 | 0.3819 | 0.7678 | 0.6181 | 0.5243 | 0.8292 |
| UCL                 | 0.75  | 4 | 495 | 425  | 832 | 194 | 0.3381 | 0.7184 | 0.6619 | 0.5380 | 0.8109 |
| UCL                 | 0.8   | 4 | 474 | 387  | 870 | 215 | 0.3079 | 0.6880 | 0.6921 | 0.5505 | 0.8018 |
| UCL                 | 0.85  | 4 | 456 | 350  | 907 | 233 | 0.2784 | 0.6618 | 0.7216 | 0.5658 | 0.7956 |
| UCL                 | 0.9   | 4 | 443 | 319  | 938 | 246 | 0.2538 | 0.6430 | 0.7462 | 0.5814 | 0.7922 |
| UCL                 | 0.95  | 4 | 429 | 298  | 959 | 260 | 0.2371 | 0.6226 | 0.7629 | 0.5901 | 0.7867 |
| baseline.correction | FALSE | 5 | 133 | 275  | 312 | 48  | 0.4685 | 0.7348 | 0.5315 | 0.3260 | 0.8667 |
| baseline.correction | TRUE  | 5 | 136 | 291  | 296 | 45  | 0.4957 | 0.7514 | 0.5043 | 0.3185 | 0.8680 |
| Model               | 1     | 5 | 103 | 286  | 301 | 78  | 0.4872 | 0.5691 | 0.5128 | 0.2648 | 0.7942 |
| Model               | 2     | 5 | 136 | 287  | 300 | 45  | 0.4889 | 0.7514 | 0.5111 | 0.3215 | 0.8696 |
| Model               | 3     | 5 | 144 | 290  | 297 | 37  | 0.4940 | 0.7956 | 0.5060 | 0.3318 | 0.8892 |
| Model               | 4     | 5 | 139 | 287  | 300 | 42  | 0.4889 | 0.7680 | 0.5111 | 0.3263 | 0.8772 |

|           |          |   |     |     |     |     |        |        |        |        |        |
|-----------|----------|---|-----|-----|-----|-----|--------|--------|--------|--------|--------|
| Model     | 5        | 5 | 135 | 286 | 301 | 46  | 0.4872 | 0.7459 | 0.5128 | 0.3207 | 0.8674 |
| Model     | 6        | 5 | 136 | 291 | 296 | 45  | 0.4957 | 0.7514 | 0.5043 | 0.3185 | 0.8680 |
| Model     | 7        | 5 | 142 | 289 | 298 | 39  | 0.4923 | 0.7845 | 0.5077 | 0.3295 | 0.8843 |
| Model     | 8        | 5 | 138 | 292 | 295 | 43  | 0.4974 | 0.7624 | 0.5026 | 0.3209 | 0.8728 |
| Model     | no_model | 5 | 109 | 191 | 396 | 72  | 0.3254 | 0.6022 | 0.6746 | 0.3633 | 0.8462 |
| MR_cutoff | 0.003    | 5 | 154 | 328 | 259 | 27  | 0.5588 | 0.8508 | 0.4412 | 0.3195 | 0.9056 |
| MR_cutoff | 0.004    | 5 | 144 | 307 | 280 | 37  | 0.5230 | 0.7956 | 0.4770 | 0.3193 | 0.8833 |
| MR_cutoff | 0.005    | 5 | 136 | 291 | 296 | 45  | 0.4957 | 0.7514 | 0.5043 | 0.3185 | 0.8680 |
| MR_cutoff | 0.006    | 5 | 136 | 275 | 312 | 45  | 0.4685 | 0.7514 | 0.5315 | 0.3309 | 0.8739 |
| MR_cutoff | 0.007    | 5 | 127 | 270 | 317 | 54  | 0.4600 | 0.7017 | 0.5400 | 0.3199 | 0.8544 |
| MR_cutoff | 0.008    | 5 | 121 | 254 | 333 | 60  | 0.4327 | 0.6685 | 0.5673 | 0.3227 | 0.8473 |
| MR_cutoff | 0.009    | 5 | 117 | 244 | 343 | 64  | 0.4157 | 0.6464 | 0.5843 | 0.3241 | 0.8428 |
| MR_cutoff | 0.01     | 5 | 108 | 240 | 347 | 73  | 0.4089 | 0.5967 | 0.5911 | 0.3103 | 0.8262 |
| MR_cutoff | 0.011    | 5 | 108 | 234 | 353 | 73  | 0.3986 | 0.5967 | 0.6014 | 0.3158 | 0.8286 |
| MR_cutoff | 0.012    | 5 | 107 | 227 | 360 | 74  | 0.3867 | 0.5912 | 0.6133 | 0.3204 | 0.8295 |
| MR_cutoff | 0.013    | 5 | 106 | 220 | 367 | 75  | 0.3748 | 0.5856 | 0.6252 | 0.3252 | 0.8303 |
| MR_cutoff | 0.014    | 5 | 101 | 207 | 380 | 80  | 0.3526 | 0.5580 | 0.6474 | 0.3279 | 0.8261 |
| MR_cutoff | 0.015    | 5 | 100 | 203 | 384 | 81  | 0.3458 | 0.5525 | 0.6542 | 0.3300 | 0.8258 |
| MR_cutoff | 0.016    | 5 | 90  | 193 | 394 | 91  | 0.3288 | 0.4972 | 0.6712 | 0.3180 | 0.8124 |
| MR_cutoff | 0.017    | 5 | 89  | 189 | 398 | 92  | 0.3220 | 0.4917 | 0.6780 | 0.3201 | 0.8122 |
| MR_cutoff | 0.018    | 5 | 85  | 183 | 404 | 96  | 0.3118 | 0.4696 | 0.6882 | 0.3172 | 0.8080 |
| MR_cutoff | 0.019    | 5 | 83  | 168 | 419 | 98  | 0.2862 | 0.4586 | 0.7138 | 0.3307 | 0.8104 |
| MR_cutoff | 0.02     | 5 | 79  | 165 | 422 | 102 | 0.2811 | 0.4365 | 0.7189 | 0.3238 | 0.8053 |
| MR_cutoff | 0.021    | 5 | 73  | 156 | 431 | 108 | 0.2658 | 0.4033 | 0.7342 | 0.3188 | 0.7996 |
| MR_cutoff | 0.022    | 5 | 72  | 150 | 437 | 109 | 0.2555 | 0.3978 | 0.7445 | 0.3243 | 0.8004 |
| MR_cutoff | 0.023    | 5 | 75  | 151 | 436 | 106 | 0.2572 | 0.4144 | 0.7428 | 0.3319 | 0.8044 |
| MR_cutoff | 0.024    | 5 | 66  | 148 | 439 | 115 | 0.2521 | 0.3646 | 0.7479 | 0.3084 | 0.7924 |
| MR_cutoff | 0.025    | 5 | 66  | 145 | 442 | 115 | 0.2470 | 0.3646 | 0.7530 | 0.3128 | 0.7935 |
| MR_cutoff | 0.026    | 5 | 66  | 140 | 447 | 115 | 0.2385 | 0.3646 | 0.7615 | 0.3204 | 0.7954 |
| MR_cutoff | 0.027    | 5 | 65  | 139 | 448 | 116 | 0.2368 | 0.3591 | 0.7632 | 0.3186 | 0.7943 |
| MR_cutoff | 0.028    | 5 | 65  | 139 | 448 | 116 | 0.2368 | 0.3591 | 0.7632 | 0.3186 | 0.7943 |
| MR_cutoff | 0.029    | 5 | 63  | 137 | 450 | 118 | 0.2334 | 0.3481 | 0.7666 | 0.3150 | 0.7923 |
| MR_cutoff | 0.03     | 5 | 63  | 136 | 451 | 118 | 0.2317 | 0.3481 | 0.7683 | 0.3166 | 0.7926 |
| MR_cutoff | 0.031    | 5 | 63  | 136 | 451 | 118 | 0.2317 | 0.3481 | 0.7683 | 0.3166 | 0.7926 |
| MR_cutoff | 0.032    | 5 | 63  | 136 | 451 | 118 | 0.2317 | 0.3481 | 0.7683 | 0.3166 | 0.7926 |

|               |       |   |     |     |     |     |        |        |        |        |        |
|---------------|-------|---|-----|-----|-----|-----|--------|--------|--------|--------|--------|
| MR_cutoff     | 0.033 | 5 | 60  | 132 | 455 | 121 | 0.2249 | 0.3315 | 0.7751 | 0.3125 | 0.7899 |
| MR_cutoff     | 0.034 | 5 | 63  | 135 | 452 | 118 | 0.2300 | 0.3481 | 0.7700 | 0.3182 | 0.7930 |
| MR_cutoff     | 0.035 | 5 | 61  | 134 | 453 | 120 | 0.2283 | 0.3370 | 0.7717 | 0.3128 | 0.7906 |
| MR_cutoff     | 0.036 | 5 | 61  | 127 | 460 | 120 | 0.2164 | 0.3370 | 0.7836 | 0.3245 | 0.7931 |
| MR_cutoff     | 0.037 | 5 | 63  | 130 | 457 | 118 | 0.2215 | 0.3481 | 0.7785 | 0.3264 | 0.7948 |
| MR_cutoff     | 0.038 | 5 | 63  | 129 | 458 | 118 | 0.2198 | 0.3481 | 0.7802 | 0.3281 | 0.7951 |
| MR_cutoff     | 0.039 | 5 | 59  | 130 | 457 | 122 | 0.2215 | 0.3260 | 0.7785 | 0.3122 | 0.7893 |
| MR_cutoff     | 0.04  | 5 | 59  | 118 | 469 | 122 | 0.2010 | 0.3260 | 0.7990 | 0.3333 | 0.7936 |
| MR_cutoff     | 0.041 | 5 | 59  | 118 | 469 | 122 | 0.2010 | 0.3260 | 0.7990 | 0.3333 | 0.7936 |
| MR_cutoff     | 0.042 | 5 | 59  | 118 | 469 | 122 | 0.2010 | 0.3260 | 0.7990 | 0.3333 | 0.7936 |
| MR_cutoff     | 0.043 | 5 | 59  | 118 | 469 | 122 | 0.2010 | 0.3260 | 0.7990 | 0.3333 | 0.7936 |
| MR_cutoff     | 0.044 | 5 | 57  | 115 | 472 | 124 | 0.1959 | 0.3149 | 0.8041 | 0.3314 | 0.7919 |
| MR_cutoff     | 0.045 | 5 | 57  | 113 | 474 | 124 | 0.1925 | 0.3149 | 0.8075 | 0.3353 | 0.7926 |
| MR_cutoff     | 0.046 | 5 | 57  | 111 | 476 | 124 | 0.1891 | 0.3149 | 0.8109 | 0.3393 | 0.7933 |
| MR_cutoff     | 0.047 | 5 | 57  | 110 | 477 | 124 | 0.1874 | 0.3149 | 0.8126 | 0.3413 | 0.7937 |
| MR_cutoff     | 0.048 | 5 | 56  | 109 | 478 | 125 | 0.1857 | 0.3094 | 0.8143 | 0.3394 | 0.7927 |
| MR_cutoff     | 0.049 | 5 | 56  | 110 | 477 | 125 | 0.1874 | 0.3094 | 0.8126 | 0.3373 | 0.7924 |
| MR_cutoff     | 0.05  | 5 | 56  | 110 | 477 | 125 | 0.1874 | 0.3094 | 0.8126 | 0.3373 | 0.7924 |
| N_aberrations | 1     | 5 | 166 | 459 | 134 | 15  | 0.7740 | 0.9171 | 0.2260 | 0.2656 | 0.8993 |
| N_aberrations | 2     | 5 | 151 | 365 | 226 | 30  | 0.6176 | 0.8343 | 0.3824 | 0.2926 | 0.8828 |
| N_aberrations | 3     | 5 | 136 | 291 | 296 | 45  | 0.4957 | 0.7514 | 0.5043 | 0.3185 | 0.8680 |
| N_aberrations | 4     | 5 | 123 | 229 | 358 | 58  | 0.3901 | 0.6796 | 0.6099 | 0.3494 | 0.8606 |
| N_aberrations | 5     | 5 | 109 | 176 | 395 | 72  | 0.3082 | 0.6022 | 0.6918 | 0.3825 | 0.8458 |
| N_aberrations | 6     | 5 | 99  | 133 | 423 | 82  | 0.2392 | 0.5470 | 0.7608 | 0.4267 | 0.8376 |
| UCL           | 0.05  | 5 | 174 | 463 | 124 | 7   | 0.7888 | 0.9613 | 0.2112 | 0.2732 | 0.9466 |
| UCL           | 0.1   | 5 | 171 | 449 | 138 | 10  | 0.7649 | 0.9448 | 0.2351 | 0.2758 | 0.9324 |
| UCL           | 0.15  | 5 | 168 | 415 | 172 | 13  | 0.7070 | 0.9282 | 0.2930 | 0.2882 | 0.9297 |
| UCL           | 0.2   | 5 | 165 | 392 | 195 | 16  | 0.6678 | 0.9116 | 0.3322 | 0.2962 | 0.9242 |
| UCL           | 0.25  | 5 | 161 | 365 | 222 | 20  | 0.6218 | 0.8895 | 0.3782 | 0.3061 | 0.9174 |
| UCL           | 0.3   | 5 | 161 | 345 | 242 | 20  | 0.5877 | 0.8895 | 0.4123 | 0.3182 | 0.9237 |
| UCL           | 0.35  | 5 | 154 | 332 | 255 | 27  | 0.5656 | 0.8508 | 0.4344 | 0.3169 | 0.9043 |
| UCL           | 0.4   | 5 | 147 | 317 | 270 | 34  | 0.5400 | 0.8122 | 0.4600 | 0.3168 | 0.8882 |
| UCL           | 0.45  | 5 | 143 | 306 | 281 | 38  | 0.5213 | 0.7901 | 0.4787 | 0.3185 | 0.8809 |
| UCL           | 0.5   | 5 | 136 | 291 | 296 | 45  | 0.4957 | 0.7514 | 0.5043 | 0.3185 | 0.8680 |
| UCL           | 0.55  | 5 | 133 | 275 | 312 | 48  | 0.4685 | 0.7348 | 0.5315 | 0.3260 | 0.8667 |

|                     |          |   |     |     |      |     |        |        |        |        |        |
|---------------------|----------|---|-----|-----|------|-----|--------|--------|--------|--------|--------|
| UCL                 | 0.6      | 5 | 125 | 264 | 323  | 56  | 0.4497 | 0.6906 | 0.5503 | 0.3213 | 0.8522 |
| UCL                 | 0.65     | 5 | 115 | 248 | 339  | 66  | 0.4225 | 0.6354 | 0.5775 | 0.3168 | 0.8370 |
| UCL                 | 0.7      | 5 | 112 | 237 | 350  | 69  | 0.4037 | 0.6188 | 0.5963 | 0.3209 | 0.8353 |
| UCL                 | 0.75     | 5 | 103 | 224 | 363  | 78  | 0.3816 | 0.5691 | 0.6184 | 0.3150 | 0.8231 |
| UCL                 | 0.8      | 5 | 91  | 203 | 384  | 90  | 0.3458 | 0.5028 | 0.6542 | 0.3095 | 0.8101 |
| UCL                 | 0.85     | 5 | 82  | 190 | 397  | 99  | 0.3237 | 0.4530 | 0.6763 | 0.3015 | 0.8004 |
| UCL                 | 0.9      | 5 | 79  | 172 | 415  | 102 | 0.2930 | 0.4365 | 0.7070 | 0.3147 | 0.8027 |
| UCL                 | 0.95     | 5 | 69  | 159 | 428  | 112 | 0.2709 | 0.3812 | 0.7291 | 0.3026 | 0.7926 |
| baseline.correction | FALSE    | 6 | 542 | 664 | 1061 | 239 | 0.3849 | 0.6940 | 0.6151 | 0.4494 | 0.8162 |
| baseline.correction | TRUE     | 6 | 584 | 738 | 987  | 197 | 0.4278 | 0.7478 | 0.5722 | 0.4418 | 0.8336 |
| Model               | 1        | 6 | 558 | 789 | 936  | 223 | 0.4574 | 0.7145 | 0.5426 | 0.4143 | 0.8076 |
| Model               | 2        | 6 | 576 | 781 | 944  | 205 | 0.4528 | 0.7375 | 0.5472 | 0.4245 | 0.8216 |
| Model               | 3        | 6 | 572 | 768 | 957  | 209 | 0.4452 | 0.7324 | 0.5548 | 0.4269 | 0.8208 |
| Model               | 4        | 6 | 575 | 750 | 975  | 206 | 0.4348 | 0.7362 | 0.5652 | 0.4340 | 0.8256 |
| Model               | 5        | 6 | 579 | 739 | 986  | 202 | 0.4284 | 0.7414 | 0.5716 | 0.4393 | 0.8300 |
| Model               | 6        | 6 | 584 | 738 | 987  | 197 | 0.4278 | 0.7478 | 0.5722 | 0.4418 | 0.8336 |
| Model               | 7        | 6 | 573 | 727 | 998  | 208 | 0.4214 | 0.7337 | 0.5786 | 0.4408 | 0.8275 |
| Model               | 8        | 6 | 572 | 723 | 1002 | 209 | 0.4191 | 0.7324 | 0.5809 | 0.4417 | 0.8274 |
| Model               | no_model | 6 | 429 | 355 | 1370 | 352 | 0.2058 | 0.5493 | 0.7942 | 0.5472 | 0.7956 |
| MR_cutoff           | 0.003    | 6 | 620 | 896 | 829  | 161 | 0.5194 | 0.7939 | 0.4806 | 0.4090 | 0.8374 |
| MR_cutoff           | 0.004    | 6 | 603 | 812 | 913  | 178 | 0.4707 | 0.7721 | 0.5293 | 0.4261 | 0.8368 |
| MR_cutoff           | 0.005    | 6 | 584 | 738 | 987  | 197 | 0.4278 | 0.7478 | 0.5722 | 0.4418 | 0.8336 |
| MR_cutoff           | 0.006    | 6 | 540 | 672 | 1053 | 241 | 0.3896 | 0.6914 | 0.6104 | 0.4455 | 0.8138 |
| MR_cutoff           | 0.007    | 6 | 516 | 622 | 1103 | 265 | 0.3606 | 0.6607 | 0.6394 | 0.4534 | 0.8063 |
| MR_cutoff           | 0.008    | 6 | 502 | 601 | 1124 | 279 | 0.3484 | 0.6428 | 0.6516 | 0.4551 | 0.8011 |
| MR_cutoff           | 0.009    | 6 | 489 | 579 | 1146 | 292 | 0.3357 | 0.6261 | 0.6643 | 0.4579 | 0.7969 |
| MR_cutoff           | 0.01     | 6 | 477 | 550 | 1175 | 304 | 0.3188 | 0.6108 | 0.6812 | 0.4645 | 0.7945 |
| MR_cutoff           | 0.011    | 6 | 451 | 515 | 1210 | 330 | 0.2986 | 0.5775 | 0.7014 | 0.4669 | 0.7857 |
| MR_cutoff           | 0.012    | 6 | 435 | 492 | 1233 | 346 | 0.2852 | 0.5570 | 0.7148 | 0.4693 | 0.7809 |
| MR_cutoff           | 0.013    | 6 | 419 | 476 | 1249 | 362 | 0.2759 | 0.5365 | 0.7241 | 0.4682 | 0.7753 |
| MR_cutoff           | 0.014    | 6 | 413 | 463 | 1262 | 368 | 0.2684 | 0.5288 | 0.7316 | 0.4715 | 0.7742 |
| MR_cutoff           | 0.015    | 6 | 403 | 426 | 1299 | 378 | 0.2470 | 0.5160 | 0.7530 | 0.4861 | 0.7746 |
| MR_cutoff           | 0.016    | 6 | 392 | 407 | 1318 | 389 | 0.2359 | 0.5019 | 0.7641 | 0.4906 | 0.7721 |
| MR_cutoff           | 0.017    | 6 | 386 | 392 | 1333 | 395 | 0.2272 | 0.4942 | 0.7728 | 0.4961 | 0.7714 |
| MR_cutoff           | 0.018    | 6 | 376 | 369 | 1356 | 405 | 0.2139 | 0.4814 | 0.7861 | 0.5047 | 0.7700 |



|               |       |   |     |      |      |     |        |        |        |        |        |
|---------------|-------|---|-----|------|------|-----|--------|--------|--------|--------|--------|
| MR_cutoff     | 0.019 | 6 | 370 | 364  | 1361 | 411 | 0.2110 | 0.4738 | 0.7890 | 0.5041 | 0.7681 |
| MR_cutoff     | 0.02  | 6 | 364 | 352  | 1373 | 417 | 0.2041 | 0.4661 | 0.7959 | 0.5084 | 0.7670 |
| MR_cutoff     | 0.021 | 6 | 358 | 338  | 1387 | 423 | 0.1959 | 0.4584 | 0.8041 | 0.5144 | 0.7663 |
| MR_cutoff     | 0.022 | 6 | 350 | 328  | 1397 | 431 | 0.1901 | 0.4481 | 0.8099 | 0.5162 | 0.7642 |
| MR_cutoff     | 0.023 | 6 | 350 | 325  | 1400 | 431 | 0.1884 | 0.4481 | 0.8116 | 0.5185 | 0.7646 |
| MR_cutoff     | 0.024 | 6 | 345 | 324  | 1401 | 436 | 0.1878 | 0.4417 | 0.8122 | 0.5157 | 0.7627 |
| MR_cutoff     | 0.025 | 6 | 335 | 316  | 1409 | 446 | 0.1832 | 0.4289 | 0.8168 | 0.5146 | 0.7596 |
| MR_cutoff     | 0.026 | 6 | 327 | 309  | 1416 | 454 | 0.1791 | 0.4187 | 0.8209 | 0.5142 | 0.7572 |
| MR_cutoff     | 0.027 | 6 | 324 | 299  | 1426 | 457 | 0.1733 | 0.4149 | 0.8267 | 0.5201 | 0.7573 |
| MR_cutoff     | 0.028 | 6 | 324 | 295  | 1430 | 457 | 0.1710 | 0.4149 | 0.8290 | 0.5234 | 0.7578 |
| MR_cutoff     | 0.029 | 6 | 321 | 285  | 1440 | 460 | 0.1652 | 0.4110 | 0.8348 | 0.5297 | 0.7579 |
| MR_cutoff     | 0.03  | 6 | 318 | 278  | 1447 | 463 | 0.1612 | 0.4072 | 0.8388 | 0.5336 | 0.7576 |
| MR_cutoff     | 0.031 | 6 | 316 | 275  | 1450 | 465 | 0.1594 | 0.4046 | 0.8406 | 0.5347 | 0.7572 |
| MR_cutoff     | 0.032 | 6 | 316 | 269  | 1456 | 465 | 0.1559 | 0.4046 | 0.8441 | 0.5402 | 0.7579 |
| MR_cutoff     | 0.033 | 6 | 314 | 264  | 1461 | 467 | 0.1530 | 0.4020 | 0.8470 | 0.5433 | 0.7578 |
| MR_cutoff     | 0.034 | 6 | 307 | 255  | 1470 | 474 | 0.1478 | 0.3931 | 0.8522 | 0.5463 | 0.7562 |
| MR_cutoff     | 0.035 | 6 | 307 | 257  | 1468 | 474 | 0.1490 | 0.3931 | 0.8510 | 0.5443 | 0.7559 |
| MR_cutoff     | 0.036 | 6 | 303 | 252  | 1473 | 478 | 0.1461 | 0.3880 | 0.8539 | 0.5459 | 0.7550 |
| MR_cutoff     | 0.037 | 6 | 297 | 247  | 1478 | 484 | 0.1432 | 0.3803 | 0.8568 | 0.5460 | 0.7533 |
| MR_cutoff     | 0.038 | 6 | 296 | 247  | 1478 | 485 | 0.1432 | 0.3790 | 0.8568 | 0.5451 | 0.7529 |
| MR_cutoff     | 0.039 | 6 | 292 | 247  | 1478 | 489 | 0.1432 | 0.3739 | 0.8568 | 0.5417 | 0.7514 |
| MR_cutoff     | 0.04  | 6 | 292 | 247  | 1478 | 489 | 0.1432 | 0.3739 | 0.8568 | 0.5417 | 0.7514 |
| MR_cutoff     | 0.041 | 6 | 293 | 244  | 1481 | 488 | 0.1414 | 0.3752 | 0.8586 | 0.5456 | 0.7522 |
| MR_cutoff     | 0.042 | 6 | 286 | 243  | 1482 | 495 | 0.1409 | 0.3662 | 0.8591 | 0.5406 | 0.7496 |
| MR_cutoff     | 0.043 | 6 | 284 | 241  | 1484 | 497 | 0.1397 | 0.3636 | 0.8603 | 0.5410 | 0.7491 |
| MR_cutoff     | 0.044 | 6 | 282 | 239  | 1486 | 499 | 0.1386 | 0.3611 | 0.8614 | 0.5413 | 0.7486 |
| MR_cutoff     | 0.045 | 6 | 273 | 234  | 1491 | 508 | 0.1357 | 0.3496 | 0.8643 | 0.5385 | 0.7459 |
| MR_cutoff     | 0.046 | 6 | 272 | 233  | 1492 | 509 | 0.1351 | 0.3483 | 0.8649 | 0.5386 | 0.7456 |
| MR_cutoff     | 0.047 | 6 | 273 | 228  | 1497 | 508 | 0.1322 | 0.3496 | 0.8678 | 0.5449 | 0.7466 |
| MR_cutoff     | 0.048 | 6 | 271 | 229  | 1496 | 510 | 0.1328 | 0.3470 | 0.8672 | 0.5420 | 0.7458 |
| MR_cutoff     | 0.049 | 6 | 271 | 228  | 1497 | 510 | 0.1322 | 0.3470 | 0.8678 | 0.5431 | 0.7459 |
| MR_cutoff     | 0.05  | 6 | 270 | 229  | 1496 | 511 | 0.1328 | 0.3457 | 0.8672 | 0.5411 | 0.7454 |
| N_aberrations | 1     | 6 | 708 | 1256 | 481  | 74  | 0.7231 | 0.9054 | 0.2769 | 0.3605 | 0.8667 |
| N_aberrations | 2     | 6 | 650 | 955  | 775  | 132 | 0.5520 | 0.8312 | 0.4480 | 0.4050 | 0.8545 |
| N_aberrations | 3     | 6 | 584 | 738  | 987  | 197 | 0.4278 | 0.7478 | 0.5722 | 0.4418 | 0.8336 |

|               |      |   |     |      |      |     |        |        |        |        |        |
|---------------|------|---|-----|------|------|-----|--------|--------|--------|--------|--------|
| N_aberrations | 4    | 6 | 519 | 576  | 1128 | 259 | 0.3380 | 0.6671 | 0.6620 | 0.4740 | 0.8133 |
| N_aberrations | 5    | 6 | 451 | 445  | 1239 | 327 | 0.2643 | 0.5797 | 0.7357 | 0.5033 | 0.7912 |
| N_aberrations | 6    | 6 | 382 | 347  | 1314 | 394 | 0.2089 | 0.4923 | 0.7911 | 0.5240 | 0.7693 |
| UCL           | 0.05 | 6 | 749 | 1331 | 394  | 32  | 0.7716 | 0.9590 | 0.2284 | 0.3601 | 0.9249 |
| UCL           | 0.1  | 6 | 745 | 1312 | 413  | 36  | 0.7606 | 0.9539 | 0.2394 | 0.3622 | 0.9198 |
| UCL           | 0.15 | 6 | 742 | 1241 | 484  | 39  | 0.7194 | 0.9501 | 0.2806 | 0.3742 | 0.9254 |
| UCL           | 0.2  | 6 | 720 | 1160 | 565  | 61  | 0.6725 | 0.9219 | 0.3275 | 0.3830 | 0.9026 |
| UCL           | 0.25 | 6 | 697 | 1054 | 671  | 84  | 0.6110 | 0.8924 | 0.3890 | 0.3981 | 0.8887 |
| UCL           | 0.3  | 6 | 662 | 984  | 741  | 119 | 0.5704 | 0.8476 | 0.4296 | 0.4022 | 0.8616 |
| UCL           | 0.35 | 6 | 633 | 924  | 801  | 148 | 0.5357 | 0.8105 | 0.4643 | 0.4066 | 0.8440 |
| UCL           | 0.4  | 6 | 608 | 863  | 862  | 173 | 0.5003 | 0.7785 | 0.4997 | 0.4133 | 0.8329 |
| UCL           | 0.45 | 6 | 595 | 800  | 925  | 186 | 0.4638 | 0.7618 | 0.5362 | 0.4265 | 0.8326 |
| UCL           | 0.5  | 6 | 584 | 738  | 987  | 197 | 0.4278 | 0.7478 | 0.5722 | 0.4418 | 0.8336 |
| UCL           | 0.55 | 6 | 541 | 684  | 1041 | 240 | 0.3965 | 0.6927 | 0.6035 | 0.4416 | 0.8126 |
| UCL           | 0.6  | 6 | 520 | 629  | 1096 | 261 | 0.3646 | 0.6658 | 0.6354 | 0.4526 | 0.8077 |
| UCL           | 0.65 | 6 | 493 | 554  | 1171 | 288 | 0.3212 | 0.6312 | 0.6788 | 0.4709 | 0.8026 |
| UCL           | 0.7  | 6 | 455 | 498  | 1227 | 326 | 0.2887 | 0.5826 | 0.7113 | 0.4774 | 0.7901 |
| UCL           | 0.75 | 6 | 437 | 426  | 1299 | 344 | 0.2470 | 0.5595 | 0.7530 | 0.5064 | 0.7906 |
| UCL           | 0.8  | 6 | 404 | 373  | 1352 | 377 | 0.2162 | 0.5173 | 0.7838 | 0.5199 | 0.7820 |
| UCL           | 0.85 | 6 | 388 | 324  | 1401 | 393 | 0.1878 | 0.4968 | 0.8122 | 0.5449 | 0.7809 |
| UCL           | 0.9  | 6 | 358 | 284  | 1441 | 423 | 0.1646 | 0.4584 | 0.8354 | 0.5576 | 0.7731 |
| UCL           | 0.95 | 6 | 344 | 260  | 1465 | 437 | 0.1507 | 0.4405 | 0.8493 | 0.5695 | 0.7702 |
