# Supplementary material for: Exploring Options for Syndromic Surveillance in Aquaculture: Outbreak Detection of Salmon Pancreas Disease Using Production Data from Norwegian Farms
Source: Hindawi journal article supplement (doi:10.1155/2024/9861677), 2024-01-01
Supplement: f2 [file 9861677.f2.pdf]

| Parameter           | Parameter setting | Production area | TP | FP  | TN  | FN | FAR    | TPR(Se) | TNR(Sp) | PPV    | NPV    | Median time months | Q1 time months | Q3 time months |
|---------------------|-------------------|-----------------|----|-----|-----|----|--------|---------|---------|--------|--------|--------------------|----------------|----------------|
| baseline.correction | FALSE             | 3               | 70 | 69  | 80  | 16 | 0.4631 | 0.8140  | 0.5369  | 0.5036 | 0.8333 | 1.00               | -3.00          | 4.00           |
| baseline.correction | TRUE              | 3               | 73 | 72  | 77  | 13 | 0.4832 | 0.8488  | 0.5168  | 0.5034 | 0.8556 | 1.00               | -3.00          | 4.00           |
| Model               | 1                 | 3               | 73 | 81  | 68  | 13 | 0.5436 | 0.8488  | 0.4564  | 0.4740 | 0.8395 | -1.00              | -3.00          | 1.75           |
| Model               | 2                 | 3               | 79 | 85  | 64  | 7  | 0.5705 | 0.9186  | 0.4295  | 0.4817 | 0.9014 | 0.00               | -3.00          | 2.00           |
| Model               | 3                 | 3               | 79 | 85  | 64  | 7  | 0.5705 | 0.9186  | 0.4295  | 0.4817 | 0.9014 | 1.00               | -3.00          | 3.00           |
| Model               | 4                 | 3               | 79 | 86  | 63  | 7  | 0.5772 | 0.9186  | 0.4228  | 0.4788 | 0.9000 | 1.00               | -3.00          | 3.00           |
| Model               | 5                 | 3               | 75 | 72  | 77  | 11 | 0.4832 | 0.8721  | 0.5168  | 0.5102 | 0.8750 | 1.00               | -3.50          | 3.00           |
| Model               | 6                 | 3               | 73 | 72  | 77  | 13 | 0.4832 | 0.8488  | 0.5168  | 0.5034 | 0.8556 | 1.00               | -3.00          | 4.00           |
| Model               | 7                 | 3               | 72 | 76  | 73  | 14 | 0.5101 | 0.8372  | 0.4899  | 0.4865 | 0.8391 | 1.00               | -3.25          | 4.00           |
| Model               | 8                 | 3               | 72 | 74  | 75  | 14 | 0.4966 | 0.8372  | 0.5034  | 0.4932 | 0.8427 | 1.00               | -3.25          | 4.00           |
| Model               | no_model          | 3               | 44 | 40  | 109 | 42 | 0.2685 | 0.5116  | 0.7315  | 0.5238 | 0.7219 | 4.50               | 0.75           | 7.00           |
| MR_cutoff           | 0.003             | 3               | 86 | 130 | 19  | 0  | 0.8725 | 1.0000  | 0.1275  | 0.3981 | 1.0000 | -3.00              | -7.00          | -1.00          |
| MR_cutoff           | 0.004             | 3               | 86 | 123 | 26  | 0  | 0.8255 | 1.0000  | 0.1745  | 0.4115 | 1.0000 | -3.00              | -6.00          | 0.00           |
| MR_cutoff           | 0.005             | 3               | 86 | 119 | 30  | 0  | 0.7987 | 1.0000  | 0.2013  | 0.4195 | 1.0000 | -2.00              | -6.00          | 0.00           |
| MR_cutoff           | 0.006             | 3               | 85 | 114 | 35  | 1  | 0.7651 | 0.9884  | 0.2349  | 0.4271 | 0.9722 | -2.00              | -6.00          | 1.00           |
| MR_cutoff           | 0.007             | 3               | 81 | 111 | 38  | 5  | 0.7450 | 0.9419  | 0.2550  | 0.4219 | 0.8837 | -2.00              | -5.00          | 1.00           |
| MR_cutoff           | 0.008             | 3               | 81 | 105 | 44  | 5  | 0.7047 | 0.9419  | 0.2953  | 0.4355 | 0.8980 | -2.00              | -5.00          | 1.00           |
| MR_cutoff           | 0.009             | 3               | 80 | 102 | 47  | 6  | 0.6846 | 0.9302  | 0.3154  | 0.4396 | 0.8868 | -2.00              | -4.00          | 1.25           |
| MR_cutoff           | 0.01              | 3               | 79 | 97  | 52  | 7  | 0.6510 | 0.9186  | 0.3490  | 0.4489 | 0.8814 | -1.00              | -4.00          | 1.50           |
| MR_cutoff           | 0.011             | 3               | 79 | 92  | 57  | 7  | 0.6174 | 0.9186  | 0.3826  | 0.4620 | 0.8906 | -1.00              | -4.00          | 1.50           |
| MR_cutoff           | 0.012             | 3               | 79 | 86  | 63  | 7  | 0.5772 | 0.9186  | 0.4228  | 0.4788 | 0.9000 | -1.00              | -4.00          | 2.00           |
| MR_cutoff           | 0.013             | 3               | 78 | 82  | 67  | 8  | 0.5503 | 0.9070  | 0.4497  | 0.4875 | 0.8933 | 0.00               | -3.00          | 2.00           |
| MR_cutoff           | 0.014             | 3               | 77 | 77  | 72  | 9  | 0.5168 | 0.8953  | 0.4832  | 0.5000 | 0.8889 | 1.00               | -3.00          | 3.00           |
| MR_cutoff           | 0.015             | 3               | 77 | 75  | 74  | 9  | 0.5034 | 0.8953  | 0.4966  | 0.5066 | 0.8916 | 1.00               | -3.00          | 3.00           |
| MR_cutoff           | 0.016             | 3               | 76 | 75  | 74  | 10 | 0.5034 | 0.8837  | 0.4966  | 0.5033 | 0.8810 | 1.00               | -3.00          | 3.00           |
| MR_cutoff           | 0.017             | 3               | 75 | 75  | 74  | 11 | 0.5034 | 0.8721  | 0.4966  | 0.5000 | 0.8706 | 1.00               | -3.00          | 3.00           |
| MR_cutoff           | 0.018             | 3               | 74 | 73  | 76  | 12 | 0.4899 | 0.8605  | 0.5101  | 0.5034 | 0.8636 | 1.00               | -3.00          | 3.00           |
| MR_cutoff           | 0.019             | 3               | 74 | 72  | 77  | 12 | 0.4832 | 0.8605  | 0.5168  | 0.5068 | 0.8652 | 1.00               | -3.00          | 4.00           |
| MR_cutoff           | 0.02              | 3               | 73 | 72  | 77  | 13 | 0.4832 | 0.8488  | 0.5168  | 0.5034 | 0.8556 | 1.00               | -3.00          | 4.00           |
| MR_cutoff           | 0.021             | 3               | 71 | 71  | 78  | 15 | 0.4765 | 0.8256  | 0.5235  | 0.5000 | 0.8387 | 1.00               | -3.00          | 4.00           |
| MR_cutoff           | 0.022             | 3               | 70 | 71  | 78  | 16 | 0.4765 | 0.8140  | 0.5235  | 0.4965 | 0.8298 | 1.00               | -2.75          | 4.00           |

|               |       |   |    |     |    |    |        |        |        |        |        |       |       |       |
|---------------|-------|---|----|-----|----|----|--------|--------|--------|--------|--------|-------|-------|-------|
| MR_cutoff     | 0.023 | 3 | 70 | 70  | 79 | 16 | 0.4698 | 0.8140 | 0.5302 | 0.5000 | 0.8316 | 1.00  | -2.75 | 4.00  |
| MR_cutoff     | 0.024 | 3 | 68 | 70  | 79 | 18 | 0.4698 | 0.7907 | 0.5302 | 0.4928 | 0.8144 | 1.00  | -3.00 | 4.00  |
| MR_cutoff     | 0.025 | 3 | 67 | 68  | 81 | 19 | 0.4564 | 0.7791 | 0.5436 | 0.4963 | 0.8100 | 1.00  | -3.00 | 4.00  |
| MR_cutoff     | 0.026 | 3 | 67 | 67  | 82 | 19 | 0.4497 | 0.7791 | 0.5503 | 0.5000 | 0.8119 | 1.00  | -2.50 | 4.00  |
| MR_cutoff     | 0.027 | 3 | 65 | 65  | 84 | 21 | 0.4362 | 0.7558 | 0.5638 | 0.5000 | 0.8000 | 1.00  | -3.00 | 4.00  |
| MR_cutoff     | 0.028 | 3 | 64 | 65  | 84 | 22 | 0.4362 | 0.7442 | 0.5638 | 0.4961 | 0.7925 | 1.50  | -3.00 | 4.00  |
| MR_cutoff     | 0.029 | 3 | 63 | 65  | 84 | 23 | 0.4362 | 0.7326 | 0.5638 | 0.4922 | 0.7850 | 2.00  | -2.50 | 4.00  |
| MR_cutoff     | 0.03  | 3 | 60 | 65  | 84 | 26 | 0.4362 | 0.6977 | 0.5638 | 0.4800 | 0.7636 | 1.50  | -3.00 | 4.25  |
| MR_cutoff     | 0.031 | 3 | 62 | 65  | 84 | 24 | 0.4362 | 0.7209 | 0.5638 | 0.4882 | 0.7778 | 2.00  | -2.75 | 4.00  |
| MR_cutoff     | 0.032 | 3 | 62 | 65  | 84 | 24 | 0.4362 | 0.7209 | 0.5638 | 0.4882 | 0.7778 | 2.00  | -2.75 | 4.00  |
| MR_cutoff     | 0.033 | 3 | 62 | 65  | 84 | 24 | 0.4362 | 0.7209 | 0.5638 | 0.4882 | 0.7778 | 2.00  | -2.75 | 5.00  |
| MR_cutoff     | 0.034 | 3 | 61 | 65  | 84 | 25 | 0.4362 | 0.7093 | 0.5638 | 0.4841 | 0.7706 | 2.00  | -3.00 | 5.00  |
| MR_cutoff     | 0.035 | 3 | 60 | 65  | 84 | 26 | 0.4362 | 0.6977 | 0.5638 | 0.4800 | 0.7636 | 2.00  | -3.00 | 5.00  |
| MR_cutoff     | 0.036 | 3 | 60 | 63  | 86 | 26 | 0.4228 | 0.6977 | 0.5772 | 0.4878 | 0.7679 | 2.00  | -3.00 | 5.00  |
| MR_cutoff     | 0.037 | 3 | 60 | 61  | 88 | 26 | 0.4094 | 0.6977 | 0.5906 | 0.4959 | 0.7719 | 2.00  | -2.00 | 5.00  |
| MR_cutoff     | 0.038 | 3 | 60 | 61  | 88 | 26 | 0.4094 | 0.6977 | 0.5906 | 0.4959 | 0.7719 | 2.00  | -2.00 | 5.00  |
| MR_cutoff     | 0.039 | 3 | 59 | 61  | 88 | 27 | 0.4094 | 0.6860 | 0.5906 | 0.4917 | 0.7652 | 2.00  | -2.00 | 5.00  |
| MR_cutoff     | 0.04  | 3 | 58 | 61  | 88 | 28 | 0.4094 | 0.6744 | 0.5906 | 0.4874 | 0.7586 | 2.00  | -2.00 | 5.00  |
| MR_cutoff     | 0.041 | 3 | 58 | 61  | 88 | 28 | 0.4094 | 0.6744 | 0.5906 | 0.4874 | 0.7586 | 2.00  | -2.00 | 5.00  |
| MR_cutoff     | 0.042 | 3 | 56 | 61  | 88 | 30 | 0.4094 | 0.6512 | 0.5906 | 0.4786 | 0.7458 | 2.00  | -2.00 | 5.00  |
| MR_cutoff     | 0.043 | 3 | 56 | 60  | 89 | 30 | 0.4027 | 0.6512 | 0.5973 | 0.4828 | 0.7479 | 2.00  | -2.00 | 5.00  |
| MR_cutoff     | 0.044 | 3 | 56 | 57  | 92 | 30 | 0.3826 | 0.6512 | 0.6174 | 0.4956 | 0.7541 | 2.00  | -2.00 | 5.25  |
| MR_cutoff     | 0.045 | 3 | 56 | 56  | 93 | 30 | 0.3758 | 0.6512 | 0.6242 | 0.5000 | 0.7561 | 2.00  | -2.00 | 5.25  |
| MR_cutoff     | 0.046 | 3 | 56 | 56  | 93 | 30 | 0.3758 | 0.6512 | 0.6242 | 0.5000 | 0.7561 | 2.00  | -2.00 | 5.25  |
| MR_cutoff     | 0.047 | 3 | 56 | 56  | 93 | 30 | 0.3758 | 0.6512 | 0.6242 | 0.5000 | 0.7561 | 2.00  | -2.00 | 5.25  |
| MR_cutoff     | 0.048 | 3 | 56 | 56  | 93 | 30 | 0.3758 | 0.6512 | 0.6242 | 0.5000 | 0.7561 | 2.00  | -2.00 | 5.25  |
| MR_cutoff     | 0.049 | 3 | 56 | 56  | 93 | 30 | 0.3758 | 0.6512 | 0.6242 | 0.5000 | 0.7561 | 2.00  | -2.00 | 5.25  |
| MR_cutoff     | 0.05  | 3 | 56 | 56  | 93 | 30 | 0.3758 | 0.6512 | 0.6242 | 0.5000 | 0.7561 | 2.00  | -2.00 | 5.25  |
| N_aberrations | 1     | 3 | 86 | 146 | 23 | 0  | 0.8639 | 1.0000 | 0.1361 | 0.3707 | 1.0000 | -4.00 | -8.00 | -2.00 |
| N_aberrations | 2     | 3 | 82 | 108 | 53 | 4  | 0.6708 | 0.9535 | 0.3292 | 0.4316 | 0.9298 | -2.00 | -5.00 | 1.00  |
| N_aberrations | 3     | 3 | 73 | 72  | 77 | 13 | 0.4832 | 0.8488 | 0.5168 | 0.5034 | 0.8556 | 1.00  | -3.00 | 4.00  |
| N_aberrations | 4     | 3 | 59 | 56  | 81 | 26 | 0.4088 | 0.6941 | 0.5912 | 0.5130 | 0.7570 | 3.00  | -0.50 | 6.00  |
| N_aberrations | 5     | 3 | 39 | 39  | 89 | 46 | 0.3047 | 0.4588 | 0.6953 | 0.5000 | 0.6593 | 3.00  | 0.00  | 6.00  |
| N_aberrations | 6     | 3 | 25 | 23  | 97 | 60 | 0.1917 | 0.2941 | 0.8083 | 0.5208 | 0.6178 | 5.00  | 1.00  | 7.00  |
| UCL           | 0.05  | 3 | 86 | 148 | 1  | 0  | 0.9933 | 1.0000 | 0.0067 | 0.3675 | 1.0000 | -6.00 | -9.00 | -2.00 |

|                     |          |   |    |     |     |    |        |        |        |        |        |       |       |       |
|---------------------|----------|---|----|-----|-----|----|--------|--------|--------|--------|--------|-------|-------|-------|
| UCL                 | 0.1      | 3 | 86 | 147 | 2   | 0  | 0.9866 | 1.0000 | 0.0134 | 0.3691 | 1.0000 | -6.00 | -9.00 | -2.00 |
| UCL                 | 0.15     | 3 | 86 | 147 | 2   | 0  | 0.9866 | 1.0000 | 0.0134 | 0.3691 | 1.0000 | -6.00 | -9.00 | -2.00 |
| UCL                 | 0.2      | 3 | 86 | 142 | 7   | 0  | 0.9530 | 1.0000 | 0.0470 | 0.3772 | 1.0000 | -5.00 | -8.00 | -1.00 |
| UCL                 | 0.25     | 3 | 86 | 135 | 14  | 0  | 0.9060 | 1.0000 | 0.0940 | 0.3891 | 1.0000 | -4.00 | -7.00 | -1.00 |
| UCL                 | 0.3      | 3 | 86 | 127 | 22  | 0  | 0.8523 | 1.0000 | 0.1477 | 0.4038 | 1.0000 | -3.00 | -6.00 | 0.00  |
| UCL                 | 0.35     | 3 | 85 | 121 | 28  | 1  | 0.8121 | 0.9884 | 0.1879 | 0.4126 | 0.9655 | -3.00 | -6.00 | 0.00  |
| UCL                 | 0.4      | 3 | 84 | 115 | 34  | 2  | 0.7718 | 0.9767 | 0.2282 | 0.4221 | 0.9444 | -2.00 | -5.00 | 1.00  |
| UCL                 | 0.45     | 3 | 81 | 110 | 39  | 5  | 0.7383 | 0.9419 | 0.2617 | 0.4241 | 0.8864 | -2.00 | -5.00 | 1.75  |
| UCL                 | 0.5      | 3 | 79 | 98  | 51  | 7  | 0.6577 | 0.9186 | 0.3423 | 0.4463 | 0.8793 | -2.00 | -4.00 | 2.00  |
| UCL                 | 0.55     | 3 | 77 | 90  | 59  | 9  | 0.6040 | 0.8953 | 0.3960 | 0.4611 | 0.8676 | -1.00 | -4.00 | 2.00  |
| UCL                 | 0.6      | 3 | 75 | 75  | 74  | 11 | 0.5034 | 0.8721 | 0.4966 | 0.5000 | 0.8706 | 1.00  | -3.00 | 3.00  |
| UCL                 | 0.65     | 3 | 73 | 72  | 77  | 13 | 0.4832 | 0.8488 | 0.5168 | 0.5034 | 0.8556 | 1.00  | -3.00 | 4.00  |
| UCL                 | 0.7      | 3 | 69 | 69  | 80  | 17 | 0.4631 | 0.8023 | 0.5369 | 0.5000 | 0.8247 | 2.00  | -3.00 | 4.00  |
| UCL                 | 0.75     | 3 | 61 | 65  | 84  | 25 | 0.4362 | 0.7093 | 0.5638 | 0.4841 | 0.7706 | 2.00  | -3.00 | 5.00  |
| UCL                 | 0.8      | 3 | 54 | 59  | 90  | 32 | 0.3960 | 0.6279 | 0.6040 | 0.4779 | 0.7377 | 2.00  | -2.75 | 5.00  |
| UCL                 | 0.85     | 3 | 51 | 51  | 98  | 35 | 0.3423 | 0.5930 | 0.6577 | 0.5000 | 0.7368 | 3.00  | -2.00 | 5.50  |
| UCL                 | 0.9      | 3 | 48 | 49  | 100 | 38 | 0.3289 | 0.5581 | 0.6711 | 0.4948 | 0.7246 | 3.00  | -0.25 | 6.00  |
| UCL                 | 0.95     | 3 | 47 | 46  | 103 | 39 | 0.3087 | 0.5465 | 0.6913 | 0.5054 | 0.7254 | 3.00  | 0.00  | 6.00  |
| baseline.correction | FALSE    | 4 | 79 | 37  | 38  | 16 | 0.4933 | 0.8316 | 0.5067 | 0.6810 | 0.7037 | 1.00  | -2.75 | 3.75  |
| baseline.correction | TRUE     | 4 | 81 | 41  | 34  | 14 | 0.5467 | 0.8526 | 0.4533 | 0.6639 | 0.7083 | 1.00  | -3.00 | 3.00  |
| Model               | 1        | 4 | 79 | 37  | 38  | 16 | 0.4933 | 0.8316 | 0.5067 | 0.6810 | 0.7037 | 1.00  | -4.00 | 3.00  |
| Model               | 2        | 4 | 90 | 45  | 30  | 5  | 0.6000 | 0.9474 | 0.4000 | 0.6667 | 0.8571 | 1.00  | -2.00 | 3.00  |
| Model               | 3        | 4 | 90 | 45  | 30  | 5  | 0.6000 | 0.9474 | 0.4000 | 0.6667 | 0.8571 | 1.00  | -2.00 | 4.00  |
| Model               | 4        | 4 | 89 | 45  | 30  | 6  | 0.6000 | 0.9368 | 0.4000 | 0.6642 | 0.8333 | 1.00  | -2.00 | 4.00  |
| Model               | 5        | 4 | 83 | 43  | 32  | 12 | 0.5733 | 0.8737 | 0.4267 | 0.6587 | 0.7273 | 1.00  | -3.00 | 3.00  |
| Model               | 6        | 4 | 81 | 41  | 34  | 14 | 0.5467 | 0.8526 | 0.4533 | 0.6639 | 0.7083 | 1.00  | -3.00 | 3.00  |
| Model               | 7        | 4 | 81 | 39  | 36  | 14 | 0.5200 | 0.8526 | 0.4800 | 0.6750 | 0.7200 | 1.00  | -2.00 | 4.00  |
| Model               | 8        | 4 | 81 | 39  | 36  | 14 | 0.5200 | 0.8526 | 0.4800 | 0.6750 | 0.7200 | 1.00  | -2.00 | 4.00  |
| Model               | no_model | 4 | 52 | 13  | 62  | 43 | 0.1733 | 0.5474 | 0.8267 | 0.8000 | 0.5905 | 3.00  | 0.00  | 6.00  |
| MR_cutoff           | 0.003    | 4 | 94 | 65  | 10  | 1  | 0.8667 | 0.9895 | 0.1333 | 0.5912 | 0.9091 | -3.00 | -6.00 | 0.00  |
| MR_cutoff           | 0.004    | 4 | 93 | 63  | 12  | 2  | 0.8400 | 0.9789 | 0.1600 | 0.5962 | 0.8571 | -2.00 | -5.00 | 1.00  |
| MR_cutoff           | 0.005    | 4 | 93 | 59  | 16  | 2  | 0.7867 | 0.9789 | 0.2133 | 0.6118 | 0.8889 | -2.00 | -5.00 | 1.00  |
| MR_cutoff           | 0.006    | 4 | 92 | 58  | 17  | 3  | 0.7733 | 0.9684 | 0.2267 | 0.6133 | 0.8500 | -1.50 | -5.00 | 1.00  |
| MR_cutoff           | 0.007    | 4 | 91 | 57  | 18  | 4  | 0.7600 | 0.9579 | 0.2400 | 0.6149 | 0.8182 | -1.00 | -5.00 | 2.00  |
| MR_cutoff           | 0.008    | 4 | 91 | 55  | 20  | 4  | 0.7333 | 0.9579 | 0.2667 | 0.6233 | 0.8333 | -1.00 | -4.50 | 2.00  |

|           |       |   |    |    |    |    |        |        |        |        |        |      |       |      |
|-----------|-------|---|----|----|----|----|--------|--------|--------|--------|--------|------|-------|------|
| MR_cutoff | 0.009 | 4 | 90 | 53 | 22 | 5  | 0.7067 | 0.9474 | 0.2933 | 0.6294 | 0.8148 | 0.00 | -5.00 | 2.00 |
| MR_cutoff | 0.01  | 4 | 89 | 51 | 24 | 6  | 0.6800 | 0.9368 | 0.3200 | 0.6357 | 0.8000 | 0.00 | -5.00 | 3.00 |
| MR_cutoff | 0.011 | 4 | 89 | 50 | 25 | 6  | 0.6667 | 0.9368 | 0.3333 | 0.6403 | 0.8065 | 0.00 | -3.50 | 3.00 |
| MR_cutoff | 0.012 | 4 | 89 | 48 | 27 | 6  | 0.6400 | 0.9368 | 0.3600 | 0.6496 | 0.8182 | 1.00 | -3.00 | 3.00 |
| MR_cutoff | 0.013 | 4 | 89 | 46 | 29 | 6  | 0.6133 | 0.9368 | 0.3867 | 0.6593 | 0.8286 | 1.00 | -3.00 | 3.00 |
| MR_cutoff | 0.014 | 4 | 87 | 46 | 29 | 8  | 0.6133 | 0.9158 | 0.3867 | 0.6541 | 0.7838 | 1.00 | -3.00 | 3.00 |
| MR_cutoff | 0.015 | 4 | 85 | 45 | 30 | 10 | 0.6000 | 0.8947 | 0.4000 | 0.6538 | 0.7500 | 1.00 | -3.00 | 3.00 |
| MR_cutoff | 0.016 | 4 | 83 | 45 | 30 | 12 | 0.6000 | 0.8737 | 0.4000 | 0.6484 | 0.7143 | 1.00 | -3.00 | 3.00 |
| MR_cutoff | 0.017 | 4 | 83 | 45 | 30 | 12 | 0.6000 | 0.8737 | 0.4000 | 0.6484 | 0.7143 | 1.00 | -3.00 | 3.00 |
| MR_cutoff | 0.018 | 4 | 82 | 42 | 33 | 13 | 0.5600 | 0.8632 | 0.4400 | 0.6613 | 0.7174 | 1.00 | -3.00 | 3.00 |
| MR_cutoff | 0.019 | 4 | 81 | 42 | 33 | 14 | 0.5600 | 0.8526 | 0.4400 | 0.6585 | 0.7021 | 1.00 | -3.00 | 3.00 |
| MR_cutoff | 0.02  | 4 | 81 | 41 | 34 | 14 | 0.5467 | 0.8526 | 0.4533 | 0.6639 | 0.7083 | 1.00 | -3.00 | 3.00 |
| MR_cutoff | 0.021 | 4 | 81 | 41 | 34 | 14 | 0.5467 | 0.8526 | 0.4533 | 0.6639 | 0.7083 | 1.00 | -3.00 | 3.00 |
| MR_cutoff | 0.022 | 4 | 80 | 41 | 34 | 15 | 0.5467 | 0.8421 | 0.4533 | 0.6612 | 0.6939 | 1.00 | -3.00 | 3.00 |
| MR_cutoff | 0.023 | 4 | 79 | 41 | 34 | 16 | 0.5467 | 0.8316 | 0.4533 | 0.6583 | 0.6800 | 1.00 | -3.00 | 3.00 |
| MR_cutoff | 0.024 | 4 | 78 | 40 | 35 | 17 | 0.5333 | 0.8211 | 0.4667 | 0.6610 | 0.6731 | 1.00 | -3.00 | 3.00 |
| MR_cutoff | 0.025 | 4 | 77 | 39 | 36 | 18 | 0.5200 | 0.8105 | 0.4800 | 0.6638 | 0.6667 | 1.00 | -3.00 | 3.00 |
| MR_cutoff | 0.026 | 4 | 76 | 37 | 38 | 19 | 0.4933 | 0.8000 | 0.5067 | 0.6726 | 0.6667 | 1.00 | -3.00 | 3.00 |
| MR_cutoff | 0.027 | 4 | 76 | 37 | 38 | 19 | 0.4933 | 0.8000 | 0.5067 | 0.6726 | 0.6667 | 1.00 | -2.50 | 3.00 |
| MR_cutoff | 0.028 | 4 | 75 | 35 | 40 | 20 | 0.4667 | 0.7895 | 0.5333 | 0.6818 | 0.6667 | 1.00 | -2.75 | 3.00 |
| MR_cutoff | 0.029 | 4 | 73 | 35 | 40 | 22 | 0.4667 | 0.7684 | 0.5333 | 0.6759 | 0.6452 | 1.00 | -3.00 | 3.25 |
| MR_cutoff | 0.03  | 4 | 72 | 35 | 40 | 23 | 0.4667 | 0.7579 | 0.5333 | 0.6729 | 0.6349 | 1.00 | -2.50 | 4.00 |
| MR_cutoff | 0.031 | 4 | 72 | 35 | 40 | 23 | 0.4667 | 0.7579 | 0.5333 | 0.6729 | 0.6349 | 1.00 | -2.50 | 4.00 |
| MR_cutoff | 0.032 | 4 | 71 | 35 | 40 | 24 | 0.4667 | 0.7474 | 0.5333 | 0.6698 | 0.6250 | 1.00 | -2.75 | 4.00 |
| MR_cutoff | 0.033 | 4 | 71 | 35 | 40 | 24 | 0.4667 | 0.7474 | 0.5333 | 0.6698 | 0.6250 | 1.00 | -2.75 | 4.00 |
| MR_cutoff | 0.034 | 4 | 70 | 34 | 41 | 25 | 0.4533 | 0.7368 | 0.5467 | 0.6731 | 0.6212 | 1.00 | -3.00 | 4.00 |
| MR_cutoff | 0.035 | 4 | 69 | 33 | 42 | 26 | 0.4400 | 0.7263 | 0.5600 | 0.6765 | 0.6176 | 1.00 | -2.25 | 4.25 |
| MR_cutoff | 0.036 | 4 | 69 | 32 | 43 | 26 | 0.4267 | 0.7263 | 0.5733 | 0.6832 | 0.6232 | 1.00 | -2.00 | 4.00 |
| MR_cutoff | 0.037 | 4 | 69 | 33 | 42 | 26 | 0.4400 | 0.7263 | 0.5600 | 0.6765 | 0.6176 | 1.00 | -2.00 | 4.00 |
| MR_cutoff | 0.038 | 4 | 68 | 32 | 43 | 27 | 0.4267 | 0.7158 | 0.5733 | 0.6800 | 0.6143 | 1.00 | -2.00 | 4.50 |
| MR_cutoff | 0.039 | 4 | 68 | 31 | 44 | 27 | 0.4133 | 0.7158 | 0.5867 | 0.6869 | 0.6197 | 1.00 | -2.00 | 4.50 |
| MR_cutoff | 0.04  | 4 | 67 | 31 | 44 | 28 | 0.4133 | 0.7053 | 0.5867 | 0.6837 | 0.6111 | 1.00 | -2.00 | 4.75 |
| MR_cutoff | 0.041 | 4 | 67 | 31 | 44 | 28 | 0.4133 | 0.7053 | 0.5867 | 0.6837 | 0.6111 | 1.00 | -2.00 | 4.75 |
| MR_cutoff | 0.042 | 4 | 67 | 31 | 44 | 28 | 0.4133 | 0.7053 | 0.5867 | 0.6837 | 0.6111 | 1.00 | -2.00 | 5.00 |
| MR_cutoff | 0.043 | 4 | 66 | 31 | 44 | 29 | 0.4133 | 0.6947 | 0.5867 | 0.6804 | 0.6027 | 1.00 | -2.00 | 5.00 |

|                     |       |   |    |    |    |    |        |        |        |        |        |       |       |       |
|---------------------|-------|---|----|----|----|----|--------|--------|--------|--------|--------|-------|-------|-------|
| MR_cutoff           | 0.044 | 4 | 66 | 31 | 44 | 29 | 0.4133 | 0.6947 | 0.5867 | 0.6804 | 0.6027 | 1.00  | -2.00 | 5.00  |
| MR_cutoff           | 0.045 | 4 | 66 | 31 | 44 | 29 | 0.4133 | 0.6947 | 0.5867 | 0.6804 | 0.6027 | 1.00  | -2.00 | 5.00  |
| MR_cutoff           | 0.046 | 4 | 64 | 31 | 44 | 31 | 0.4133 | 0.6737 | 0.5867 | 0.6737 | 0.5867 | 1.00  | -2.00 | 5.00  |
| MR_cutoff           | 0.047 | 4 | 64 | 31 | 44 | 31 | 0.4133 | 0.6737 | 0.5867 | 0.6737 | 0.5867 | 1.00  | -1.50 | 5.00  |
| MR_cutoff           | 0.048 | 4 | 63 | 31 | 44 | 32 | 0.4133 | 0.6632 | 0.5867 | 0.6702 | 0.5789 | 1.50  | -0.75 | 5.00  |
| MR_cutoff           | 0.049 | 4 | 63 | 31 | 44 | 32 | 0.4133 | 0.6632 | 0.5867 | 0.6702 | 0.5789 | 1.50  | -0.75 | 5.00  |
| MR_cutoff           | 0.05  | 4 | 63 | 31 | 44 | 32 | 0.4133 | 0.6632 | 0.5867 | 0.6702 | 0.5789 | 1.50  | -0.75 | 5.00  |
| N_aberrations       | 1     | 4 | 96 | 77 | 15 | 0  | 0.8370 | 1.0000 | 0.1630 | 0.5549 | 1.0000 | -4.00 | -7.00 | -1.00 |
| N_aberrations       | 2     | 4 | 89 | 56 | 28 | 6  | 0.6667 | 0.9368 | 0.3333 | 0.6138 | 0.8235 | -1.00 | -4.50 | 2.00  |
| N_aberrations       | 3     | 4 | 81 | 41 | 34 | 14 | 0.5467 | 0.8526 | 0.4533 | 0.6639 | 0.7083 | 1.00  | -3.00 | 3.00  |
| N_aberrations       | 4     | 4 | 67 | 33 | 38 | 27 | 0.4648 | 0.7128 | 0.5352 | 0.6700 | 0.5846 | 2.00  | -1.00 | 5.00  |
| N_aberrations       | 5     | 4 | 51 | 20 | 45 | 42 | 0.3077 | 0.5484 | 0.6923 | 0.7183 | 0.5172 | 2.00  | -1.00 | 5.00  |
| N_aberrations       | 6     | 4 | 44 | 14 | 47 | 49 | 0.2295 | 0.4731 | 0.7705 | 0.7586 | 0.4896 | 4.00  | -1.00 | 6.00  |
| UCL                 | 0.05  | 4 | 95 | 75 | 0  | 0  | 1.0000 | 1.0000 | 0.0000 | 0.5588 | NA     | -5.00 | -7.00 | -1.00 |
| UCL                 | 0.1   | 4 | 95 | 75 | 0  | 0  | 1.0000 | 1.0000 | 0.0000 | 0.5588 | NA     | -5.00 | -7.00 | -1.00 |
| UCL                 | 0.15  | 4 | 95 | 74 | 1  | 0  | 0.9867 | 1.0000 | 0.0133 | 0.5621 | 1.0000 | -4.00 | -7.00 | -1.00 |
| UCL                 | 0.2   | 4 | 95 | 73 | 2  | 0  | 0.9733 | 1.0000 | 0.0267 | 0.5655 | 1.0000 | -4.00 | -7.00 | -1.00 |
| UCL                 | 0.25  | 4 | 95 | 71 | 4  | 0  | 0.9467 | 1.0000 | 0.0533 | 0.5723 | 1.0000 | -4.00 | -6.75 | 0.00  |
| UCL                 | 0.3   | 4 | 94 | 65 | 10 | 1  | 0.8667 | 0.9895 | 0.1333 | 0.5912 | 0.9091 | -2.00 | -5.50 | 1.00  |
| UCL                 | 0.35  | 4 | 92 | 60 | 15 | 3  | 0.8000 | 0.9684 | 0.2000 | 0.6053 | 0.8333 | -2.00 | -5.00 | 1.00  |
| UCL                 | 0.4   | 4 | 91 | 59 | 16 | 4  | 0.7867 | 0.9579 | 0.2133 | 0.6067 | 0.8000 | -2.00 | -5.00 | 1.00  |
| UCL                 | 0.45  | 4 | 91 | 54 | 21 | 4  | 0.7200 | 0.9579 | 0.2800 | 0.6276 | 0.8400 | -1.00 | -5.00 | 2.00  |
| UCL                 | 0.5   | 4 | 89 | 52 | 23 | 6  | 0.6933 | 0.9368 | 0.3067 | 0.6312 | 0.7931 | -0.50 | -4.25 | 3.00  |
| UCL                 | 0.55  | 4 | 89 | 48 | 27 | 6  | 0.6400 | 0.9368 | 0.3600 | 0.6496 | 0.8182 | 0.00  | -3.00 | 3.00  |
| UCL                 | 0.6   | 4 | 84 | 45 | 30 | 11 | 0.6000 | 0.8842 | 0.4000 | 0.6512 | 0.7317 | 1.00  | -3.00 | 3.00  |
| UCL                 | 0.65  | 4 | 81 | 41 | 34 | 14 | 0.5467 | 0.8526 | 0.4533 | 0.6639 | 0.7083 | 1.00  | -3.00 | 3.00  |
| UCL                 | 0.7   | 4 | 78 | 36 | 39 | 17 | 0.4800 | 0.8211 | 0.5200 | 0.6842 | 0.6964 | 1.00  | -2.00 | 4.00  |
| UCL                 | 0.75  | 4 | 74 | 32 | 43 | 21 | 0.4267 | 0.7789 | 0.5733 | 0.6981 | 0.6719 | 1.00  | -2.00 | 4.00  |
| UCL                 | 0.8   | 4 | 69 | 30 | 45 | 26 | 0.4000 | 0.7263 | 0.6000 | 0.6970 | 0.6338 | 2.00  | -1.00 | 5.00  |
| UCL                 | 0.85  | 4 | 61 | 26 | 49 | 34 | 0.3467 | 0.6421 | 0.6533 | 0.7011 | 0.5904 | 2.00  | -1.00 | 6.00  |
| UCL                 | 0.9   | 4 | 56 | 22 | 53 | 39 | 0.2933 | 0.5895 | 0.7067 | 0.7179 | 0.5761 | 3.00  | -0.75 | 6.00  |
| UCL                 | 0.95  | 4 | 54 | 18 | 57 | 41 | 0.2400 | 0.5684 | 0.7600 | 0.7500 | 0.5816 | 3.00  | 0.00  | 6.00  |
| baseline.correction | FALSE | 5 | 9  | 23 | 17 | 14 | 0.5750 | 0.3913 | 0.4250 | 0.2813 | 0.5484 | 1.00  | 0.00  | 5.00  |
| baseline.correction | TRUE  | 5 | 13 | 28 | 12 | 10 | 0.7000 | 0.5652 | 0.3000 | 0.3171 | 0.5455 | 0.50  | -1.75 | 3.50  |
| Model               | 1     | 5 | 12 | 21 | 19 | 11 | 0.5250 | 0.5217 | 0.4750 | 0.3636 | 0.6333 | -1.50 | -3.25 | 4.25  |

|           |          |   |    |    |    |    |        |        |        |        |        |       |       |      |
|-----------|----------|---|----|----|----|----|--------|--------|--------|--------|--------|-------|-------|------|
| Model     | 2        | 5 | 17 | 28 | 12 | 6  | 0.7000 | 0.7391 | 0.3000 | 0.3778 | 0.6667 | -1.00 | -3.00 | 2.00 |
| Model     | 3        | 5 | 18 | 29 | 11 | 5  | 0.7250 | 0.7826 | 0.2750 | 0.3830 | 0.6875 | -1.00 | -2.50 | 3.50 |
| Model     | 4        | 5 | 19 | 31 | 9  | 4  | 0.7750 | 0.8261 | 0.2250 | 0.3800 | 0.6923 | 0.50  | -1.50 | 5.00 |
| Model     | 5        | 5 | 12 | 27 | 13 | 11 | 0.6750 | 0.5217 | 0.3250 | 0.3077 | 0.5417 | 0.00  | -3.00 | 1.00 |
| Model     | 6        | 5 | 13 | 28 | 12 | 10 | 0.7000 | 0.5652 | 0.3000 | 0.3171 | 0.5455 | 0.50  | -1.75 | 3.50 |
| Model     | 7        | 5 | 15 | 27 | 13 | 8  | 0.6750 | 0.6522 | 0.3250 | 0.3571 | 0.6190 | 1.00  | -0.50 | 4.50 |
| Model     | 8        | 5 | 15 | 27 | 13 | 8  | 0.6750 | 0.6522 | 0.3250 | 0.3571 | 0.6190 | 1.00  | -0.50 | 4.50 |
| Model     | no_model | 5 | 2  | 4  | 36 | 21 | 0.1000 | 0.0870 | 0.9000 | 0.3333 | 0.6316 | 7.00  | 6.50  | 7.50 |
| MR_cutoff | 0.003    | 5 | 23 | 38 | 2  | 0  | 0.9500 | 1.0000 | 0.0500 | 0.3770 | 1.0000 | -2.50 | -5.50 | 0.25 |
| MR_cutoff | 0.004    | 5 | 23 | 37 | 3  | 0  | 0.9250 | 1.0000 | 0.0750 | 0.3833 | 1.0000 | -2.50 | -5.50 | 1.25 |
| MR_cutoff | 0.005    | 5 | 23 | 36 | 4  | 0  | 0.9000 | 1.0000 | 0.1000 | 0.3898 | 1.0000 | -2.50 | -5.00 | 1.25 |
| MR_cutoff | 0.006    | 5 | 22 | 36 | 4  | 1  | 0.9000 | 0.9565 | 0.1000 | 0.3793 | 0.8000 | -1.00 | -5.00 | 1.50 |
| MR_cutoff | 0.007    | 5 | 21 | 34 | 6  | 2  | 0.8500 | 0.9130 | 0.1500 | 0.3818 | 0.7500 | -1.00 | -4.00 | 2.75 |
| MR_cutoff | 0.008    | 5 | 19 | 33 | 7  | 4  | 0.8250 | 0.8261 | 0.1750 | 0.3654 | 0.6364 | -1.00 | -4.25 | 1.25 |
| MR_cutoff | 0.009    | 5 | 18 | 33 | 7  | 5  | 0.8250 | 0.7826 | 0.1750 | 0.3529 | 0.5833 | -1.00 | -4.50 | 1.00 |
| MR_cutoff | 0.01     | 5 | 18 | 33 | 7  | 5  | 0.8250 | 0.7826 | 0.1750 | 0.3529 | 0.5833 | -1.00 | -4.00 | 1.00 |
| MR_cutoff | 0.011    | 5 | 18 | 33 | 7  | 5  | 0.8250 | 0.7826 | 0.1750 | 0.3529 | 0.5833 | -1.00 | -3.50 | 1.00 |
| MR_cutoff | 0.012    | 5 | 18 | 33 | 7  | 5  | 0.8250 | 0.7826 | 0.1750 | 0.3529 | 0.5833 | -1.00 | -3.50 | 1.00 |
| MR_cutoff | 0.013    | 5 | 18 | 33 | 7  | 5  | 0.8250 | 0.7826 | 0.1750 | 0.3529 | 0.5833 | -1.00 | -3.50 | 1.00 |
| MR_cutoff | 0.014    | 5 | 18 | 33 | 7  | 5  | 0.8250 | 0.7826 | 0.1750 | 0.3529 | 0.5833 | -1.00 | -3.00 | 1.00 |
| MR_cutoff | 0.015    | 5 | 16 | 32 | 8  | 7  | 0.8000 | 0.6957 | 0.2000 | 0.3333 | 0.5333 | -1.00 | -3.00 | 1.00 |
| MR_cutoff | 0.016    | 5 | 16 | 32 | 8  | 7  | 0.8000 | 0.6957 | 0.2000 | 0.3333 | 0.5333 | -1.00 | -3.00 | 1.00 |
| MR_cutoff | 0.017    | 5 | 15 | 32 | 8  | 8  | 0.8000 | 0.6522 | 0.2000 | 0.3191 | 0.5000 | -0.50 | -3.25 | 1.00 |
| MR_cutoff | 0.018    | 5 | 15 | 32 | 8  | 8  | 0.8000 | 0.6522 | 0.2000 | 0.3191 | 0.5000 | -0.50 | -3.25 | 1.00 |
| MR_cutoff | 0.019    | 5 | 14 | 28 | 12 | 9  | 0.7000 | 0.6087 | 0.3000 | 0.3333 | 0.5714 | 0.00  | -2.50 | 1.50 |
| MR_cutoff | 0.02     | 5 | 13 | 28 | 12 | 10 | 0.7000 | 0.5652 | 0.3000 | 0.3171 | 0.5455 | 0.50  | -1.75 | 3.50 |
| MR_cutoff | 0.021    | 5 | 11 | 26 | 14 | 12 | 0.6500 | 0.4783 | 0.3500 | 0.2973 | 0.5385 | 1.00  | -0.25 | 4.25 |
| MR_cutoff | 0.022    | 5 | 10 | 25 | 15 | 13 | 0.6250 | 0.4348 | 0.3750 | 0.2857 | 0.5357 | 1.00  | -0.50 | 1.50 |
| MR_cutoff | 0.023    | 5 | 9  | 24 | 16 | 14 | 0.6000 | 0.3913 | 0.4000 | 0.2727 | 0.5333 | 0.50  | -0.75 | 3.50 |
| MR_cutoff | 0.024    | 5 | 8  | 24 | 16 | 15 | 0.6000 | 0.3478 | 0.4000 | 0.2500 | 0.5161 | 1.00  | 0.00  | 5.00 |
| MR_cutoff | 0.025    | 5 | 8  | 24 | 16 | 15 | 0.6000 | 0.3478 | 0.4000 | 0.2500 | 0.5161 | 1.00  | 0.00  | 5.00 |
| MR_cutoff | 0.026    | 5 | 8  | 24 | 16 | 15 | 0.6000 | 0.3478 | 0.4000 | 0.2500 | 0.5161 | 1.00  | 0.00  | 5.00 |
| MR_cutoff | 0.027    | 5 | 8  | 24 | 16 | 15 | 0.6000 | 0.3478 | 0.4000 | 0.2500 | 0.5161 | 1.00  | 0.00  | 5.00 |
| MR_cutoff | 0.028    | 5 | 8  | 24 | 16 | 15 | 0.6000 | 0.3478 | 0.4000 | 0.2500 | 0.5161 | 1.00  | 0.00  | 5.00 |
| MR_cutoff | 0.029    | 5 | 8  | 22 | 18 | 15 | 0.5500 | 0.3478 | 0.4500 | 0.2667 | 0.5455 | 1.00  | 0.00  | 5.00 |

|               |       |   |    |    |    |    |        |        |        |        |        |       |       |       |
|---------------|-------|---|----|----|----|----|--------|--------|--------|--------|--------|-------|-------|-------|
| MR_cutoff     | 0.03  | 5 | 8  | 22 | 18 | 15 | 0.5500 | 0.3478 | 0.4500 | 0.2667 | 0.5455 | 1.00  | 0.00  | 5.00  |
| MR_cutoff     | 0.031 | 5 | 8  | 22 | 18 | 15 | 0.5500 | 0.3478 | 0.4500 | 0.2667 | 0.5455 | 1.00  | 0.00  | 5.00  |
| MR_cutoff     | 0.032 | 5 | 8  | 22 | 18 | 15 | 0.5500 | 0.3478 | 0.4500 | 0.2667 | 0.5455 | 1.00  | 0.00  | 5.00  |
| MR_cutoff     | 0.033 | 5 | 8  | 21 | 19 | 15 | 0.5250 | 0.3478 | 0.4750 | 0.2759 | 0.5588 | 1.00  | 0.00  | 5.00  |
| MR_cutoff     | 0.034 | 5 | 8  | 21 | 19 | 15 | 0.5250 | 0.3478 | 0.4750 | 0.2759 | 0.5588 | 1.00  | 0.00  | 5.00  |
| MR_cutoff     | 0.035 | 5 | 8  | 21 | 19 | 15 | 0.5250 | 0.3478 | 0.4750 | 0.2759 | 0.5588 | 1.00  | 0.00  | 5.00  |
| MR_cutoff     | 0.036 | 5 | 8  | 20 | 20 | 15 | 0.5000 | 0.3478 | 0.5000 | 0.2857 | 0.5714 | 2.50  | 0.00  | 5.50  |
| MR_cutoff     | 0.037 | 5 | 8  | 20 | 20 | 15 | 0.5000 | 0.3478 | 0.5000 | 0.2857 | 0.5714 | 2.50  | 0.00  | 5.50  |
| MR_cutoff     | 0.038 | 5 | 8  | 20 | 20 | 15 | 0.5000 | 0.3478 | 0.5000 | 0.2857 | 0.5714 | 2.50  | 0.00  | 5.50  |
| MR_cutoff     | 0.039 | 5 | 8  | 20 | 20 | 15 | 0.5000 | 0.3478 | 0.5000 | 0.2857 | 0.5714 | 2.50  | 0.00  | 5.50  |
| MR_cutoff     | 0.04  | 5 | 8  | 19 | 21 | 15 | 0.4750 | 0.3478 | 0.5250 | 0.2963 | 0.5833 | 2.50  | 0.00  | 5.50  |
| MR_cutoff     | 0.041 | 5 | 8  | 19 | 21 | 15 | 0.4750 | 0.3478 | 0.5250 | 0.2963 | 0.5833 | 2.50  | 0.00  | 5.50  |
| MR_cutoff     | 0.042 | 5 | 8  | 19 | 21 | 15 | 0.4750 | 0.3478 | 0.5250 | 0.2963 | 0.5833 | 2.50  | 0.00  | 5.50  |
| MR_cutoff     | 0.043 | 5 | 8  | 18 | 22 | 15 | 0.4500 | 0.3478 | 0.5500 | 0.3077 | 0.5946 | 2.50  | 0.00  | 5.75  |
| MR_cutoff     | 0.044 | 5 | 8  | 18 | 22 | 15 | 0.4500 | 0.3478 | 0.5500 | 0.3077 | 0.5946 | 2.50  | 0.00  | 5.75  |
| MR_cutoff     | 0.045 | 5 | 8  | 19 | 21 | 15 | 0.4750 | 0.3478 | 0.5250 | 0.2963 | 0.5833 | 2.50  | 0.00  | 5.75  |
| MR_cutoff     | 0.046 | 5 | 8  | 19 | 21 | 15 | 0.4750 | 0.3478 | 0.5250 | 0.2963 | 0.5833 | 2.50  | 0.00  | 5.75  |
| MR_cutoff     | 0.047 | 5 | 8  | 19 | 21 | 15 | 0.4750 | 0.3478 | 0.5250 | 0.2963 | 0.5833 | 2.50  | 0.00  | 5.75  |
| MR_cutoff     | 0.048 | 5 | 8  | 19 | 21 | 15 | 0.4750 | 0.3478 | 0.5250 | 0.2963 | 0.5833 | 2.50  | 0.00  | 5.75  |
| MR_cutoff     | 0.049 | 5 | 8  | 19 | 21 | 15 | 0.4750 | 0.3478 | 0.5250 | 0.2963 | 0.5833 | 2.50  | 0.00  | 5.75  |
| MR_cutoff     | 0.05  | 5 | 8  | 19 | 21 | 15 | 0.4750 | 0.3478 | 0.5250 | 0.2963 | 0.5833 | 2.50  | 0.00  | 5.75  |
| N_aberrations | 1     | 5 | 22 | 42 | 2  | 1  | 0.9545 | 0.9565 | 0.0455 | 0.3438 | 0.6667 | -4.00 | -7.00 | -2.00 |
| N_aberrations | 2     | 5 | 20 | 37 | 5  | 3  | 0.8810 | 0.8696 | 0.1190 | 0.3509 | 0.6250 | -1.00 | -4.00 | 0.00  |
| N_aberrations | 3     | 5 | 13 | 28 | 12 | 10 | 0.7000 | 0.5652 | 0.3000 | 0.3171 | 0.5455 | 0.50  | -1.75 | 3.50  |
| N_aberrations | 4     | 5 | 10 | 21 | 19 | 13 | 0.5250 | 0.4348 | 0.4750 | 0.3226 | 0.5938 | 2.00  | 1.00  | 6.50  |
| N_aberrations | 5     | 5 | 10 | 16 | 20 | 13 | 0.4444 | 0.4348 | 0.5556 | 0.3846 | 0.6061 | 3.00  | 2.00  | 7.50  |
| N_aberrations | 6     | 5 | 6  | 9  | 24 | 17 | 0.2727 | 0.2609 | 0.7273 | 0.4000 | 0.5854 | 6.50  | 3.25  | 9.75  |
| UCL           | 0.05  | 5 | 23 | 40 | 0  | 0  | 1.0000 | 1.0000 | 0.0000 | 0.3651 | NA     | -4.00 | -9.00 | -0.75 |
| UCL           | 0.1   | 5 | 23 | 40 | 0  | 0  | 1.0000 | 1.0000 | 0.0000 | 0.3651 | NA     | -4.00 | -9.00 | -0.75 |
| UCL           | 0.15  | 5 | 23 | 40 | 0  | 0  | 1.0000 | 1.0000 | 0.0000 | 0.3651 | NA     | -4.00 | -7.50 | -0.75 |
| UCL           | 0.2   | 5 | 23 | 40 | 0  | 0  | 1.0000 | 1.0000 | 0.0000 | 0.3651 | NA     | -4.00 | -7.00 | 0.00  |
| UCL           | 0.25  | 5 | 23 | 40 | 0  | 0  | 1.0000 | 1.0000 | 0.0000 | 0.3651 | NA     | -3.00 | -7.00 | 0.00  |
| UCL           | 0.3   | 5 | 23 | 39 | 1  | 0  | 0.9750 | 1.0000 | 0.0250 | 0.3710 | 1.0000 | -2.50 | -7.00 | 0.00  |
| UCL           | 0.35  | 5 | 22 | 38 | 2  | 1  | 0.9500 | 0.9565 | 0.0500 | 0.3667 | 0.6667 | -3.00 | -5.00 | -0.50 |
| UCL           | 0.4   | 5 | 21 | 35 | 5  | 2  | 0.8750 | 0.9130 | 0.1250 | 0.3750 | 0.7143 | -1.50 | -5.00 | 0.75  |

|                     |          |   |     |    |    |    |        |        |        |        |        |       |       |       |
|---------------------|----------|---|-----|----|----|----|--------|--------|--------|--------|--------|-------|-------|-------|
| UCL                 | 0.45     | 5 | 19  | 34 | 6  | 4  | 0.8500 | 0.8261 | 0.1500 | 0.3585 | 0.6000 | -1.00 | -4.25 | 1.25  |
| UCL                 | 0.5      | 5 | 18  | 33 | 7  | 5  | 0.8250 | 0.7826 | 0.1750 | 0.3529 | 0.5833 | -1.00 | -4.50 | 1.00  |
| UCL                 | 0.55     | 5 | 17  | 33 | 7  | 6  | 0.8250 | 0.7391 | 0.1750 | 0.3400 | 0.5385 | -0.50 | -3.00 | 1.00  |
| UCL                 | 0.6      | 5 | 15  | 32 | 8  | 8  | 0.8000 | 0.6522 | 0.2000 | 0.3191 | 0.5000 | -0.50 | -3.25 | 1.00  |
| UCL                 | 0.65     | 5 | 13  | 28 | 12 | 10 | 0.7000 | 0.5652 | 0.3000 | 0.3171 | 0.5455 | 0.50  | -1.75 | 3.50  |
| UCL                 | 0.7      | 5 | 8   | 23 | 17 | 15 | 0.5750 | 0.3478 | 0.4250 | 0.2581 | 0.5313 | 2.50  | 0.00  | 5.50  |
| UCL                 | 0.75     | 5 | 8   | 20 | 20 | 15 | 0.5000 | 0.3478 | 0.5000 | 0.2857 | 0.5714 | 2.50  | 0.00  | 5.50  |
| UCL                 | 0.8      | 5 | 6   | 16 | 24 | 17 | 0.4000 | 0.2609 | 0.6000 | 0.2727 | 0.5854 | 1.00  | 0.25  | 6.25  |
| UCL                 | 0.85     | 5 | 5   | 14 | 26 | 18 | 0.3500 | 0.2174 | 0.6500 | 0.2632 | 0.5909 | 2.00  | 1.00  | 8.00  |
| UCL                 | 0.9      | 5 | 4   | 11 | 29 | 19 | 0.2750 | 0.1739 | 0.7250 | 0.2667 | 0.6042 | 6.00  | 2.75  | 8.00  |
| UCL                 | 0.95     | 5 | 4   | 7  | 33 | 19 | 0.1750 | 0.1739 | 0.8250 | 0.3636 | 0.6346 | 6.00  | 2.75  | 8.00  |
| baseline.correction | FALSE    | 6 | 73  | 26 | 71 | 35 | 0.2680 | 0.6759 | 0.7320 | 0.7374 | 0.6698 | 2.00  | -0.50 | 6.00  |
| baseline.correction | TRUE     | 6 | 77  | 36 | 61 | 31 | 0.3711 | 0.7130 | 0.6289 | 0.6814 | 0.6630 | 2.00  | -1.00 | 5.00  |
| Model               | 1        | 6 | 85  | 51 | 46 | 23 | 0.5258 | 0.7870 | 0.4742 | 0.6250 | 0.6667 | 0.50  | -3.00 | 3.75  |
| Model               | 2        | 6 | 92  | 55 | 42 | 16 | 0.5670 | 0.8519 | 0.4330 | 0.6259 | 0.7241 | 1.00  | -2.00 | 5.00  |
| Model               | 3        | 6 | 93  | 54 | 43 | 15 | 0.5567 | 0.8611 | 0.4433 | 0.6327 | 0.7414 | 1.00  | -1.00 | 5.00  |
| Model               | 4        | 6 | 91  | 49 | 48 | 17 | 0.5052 | 0.8426 | 0.4948 | 0.6500 | 0.7385 | 1.00  | -1.00 | 5.00  |
| Model               | 5        | 6 | 83  | 35 | 62 | 25 | 0.3608 | 0.7685 | 0.6392 | 0.7034 | 0.7126 | 1.00  | -2.00 | 4.00  |
| Model               | 6        | 6 | 77  | 36 | 61 | 31 | 0.3711 | 0.7130 | 0.6289 | 0.6814 | 0.6630 | 2.00  | -1.00 | 5.00  |
| Model               | 7        | 6 | 78  | 34 | 63 | 30 | 0.3505 | 0.7222 | 0.6495 | 0.6964 | 0.6774 | 2.00  | -1.00 | 4.00  |
| Model               | 8        | 6 | 78  | 32 | 65 | 30 | 0.3299 | 0.7222 | 0.6701 | 0.7091 | 0.6842 | 2.00  | -1.00 | 4.00  |
| Model               | no_model | 6 | 23  | 8  | 89 | 85 | 0.0825 | 0.2130 | 0.9175 | 0.7419 | 0.5115 | 5.00  | 1.00  | 10.00 |
| MR_cutoff           | 0.003    | 6 | 104 | 86 | 11 | 4  | 0.8866 | 0.9630 | 0.1134 | 0.5474 | 0.7333 | -2.00 | -5.00 | 2.00  |
| MR_cutoff           | 0.004    | 6 | 103 | 83 | 14 | 5  | 0.8557 | 0.9537 | 0.1443 | 0.5538 | 0.7368 | -2.00 | -5.00 | 2.00  |
| MR_cutoff           | 0.005    | 6 | 100 | 72 | 25 | 8  | 0.7423 | 0.9259 | 0.2577 | 0.5814 | 0.7576 | -1.00 | -4.50 | 2.00  |
| MR_cutoff           | 0.006    | 6 | 99  | 67 | 30 | 9  | 0.6907 | 0.9167 | 0.3093 | 0.5964 | 0.7692 | -0.50 | -4.00 | 2.75  |
| MR_cutoff           | 0.007    | 6 | 96  | 64 | 33 | 12 | 0.6598 | 0.8889 | 0.3402 | 0.6000 | 0.7333 | 0.00  | -4.00 | 3.00  |
| MR_cutoff           | 0.008    | 6 | 95  | 59 | 38 | 13 | 0.6082 | 0.8796 | 0.3918 | 0.6169 | 0.7451 | 0.00  | -3.00 | 3.25  |
| MR_cutoff           | 0.009    | 6 | 93  | 55 | 42 | 15 | 0.5670 | 0.8611 | 0.4330 | 0.6284 | 0.7368 | 0.50  | -2.75 | 3.00  |
| MR_cutoff           | 0.01     | 6 | 91  | 53 | 44 | 17 | 0.5464 | 0.8426 | 0.4536 | 0.6319 | 0.7213 | 1.00  | -3.00 | 3.00  |
| MR_cutoff           | 0.011    | 6 | 91  | 49 | 48 | 17 | 0.5052 | 0.8426 | 0.4948 | 0.6500 | 0.7385 | 1.00  | -2.25 | 4.00  |
| MR_cutoff           | 0.012    | 6 | 91  | 48 | 49 | 17 | 0.4948 | 0.8426 | 0.5052 | 0.6547 | 0.7424 | 1.00  | -2.00 | 4.00  |
| MR_cutoff           | 0.013    | 6 | 89  | 46 | 51 | 19 | 0.4742 | 0.8241 | 0.5258 | 0.6593 | 0.7286 | 1.00  | -2.00 | 4.00  |
| MR_cutoff           | 0.014    | 6 | 87  | 43 | 54 | 21 | 0.4433 | 0.8056 | 0.5567 | 0.6692 | 0.7200 | 1.00  | -2.00 | 4.00  |
| MR_cutoff           | 0.015    | 6 | 86  | 41 | 56 | 22 | 0.4227 | 0.7963 | 0.5773 | 0.6772 | 0.7179 | 1.00  | -2.00 | 4.00  |



|           |       |   |    |    |    |    |        |        |        |        |        |      |       |      |
|-----------|-------|---|----|----|----|----|--------|--------|--------|--------|--------|------|-------|------|
| MR_cutoff | 0.016 | 6 | 83 | 38 | 59 | 25 | 0.3918 | 0.7685 | 0.6082 | 0.6860 | 0.7024 | 1.00 | -2.00 | 4.00 |
| MR_cutoff | 0.017 | 6 | 82 | 38 | 59 | 26 | 0.3918 | 0.7593 | 0.6082 | 0.6833 | 0.6941 | 1.00 | -2.00 | 4.00 |
| MR_cutoff | 0.018 | 6 | 79 | 37 | 60 | 29 | 0.3814 | 0.7315 | 0.6186 | 0.6810 | 0.6742 | 1.00 | -2.00 | 5.00 |
| MR_cutoff | 0.019 | 6 | 79 | 36 | 61 | 29 | 0.3711 | 0.7315 | 0.6289 | 0.6870 | 0.6778 | 2.00 | -1.75 | 5.00 |
| MR_cutoff | 0.02  | 6 | 77 | 36 | 61 | 31 | 0.3711 | 0.7130 | 0.6289 | 0.6814 | 0.6630 | 2.00 | -1.00 | 5.00 |
| MR_cutoff | 0.021 | 6 | 77 | 35 | 62 | 31 | 0.3608 | 0.7130 | 0.6392 | 0.6875 | 0.6667 | 2.00 | -1.00 | 5.00 |
| MR_cutoff | 0.022 | 6 | 77 | 34 | 63 | 31 | 0.3505 | 0.7130 | 0.6495 | 0.6937 | 0.6702 | 2.00 | -1.00 | 5.00 |
| MR_cutoff | 0.023 | 6 | 76 | 33 | 64 | 32 | 0.3402 | 0.7037 | 0.6598 | 0.6972 | 0.6667 | 2.00 | -1.00 | 5.00 |
| MR_cutoff | 0.024 | 6 | 76 | 31 | 66 | 32 | 0.3196 | 0.7037 | 0.6804 | 0.7103 | 0.6735 | 2.00 | -1.00 | 5.00 |
| MR_cutoff | 0.025 | 6 | 75 | 28 | 69 | 33 | 0.2887 | 0.6944 | 0.7113 | 0.7282 | 0.6765 | 2.00 | -1.00 | 5.00 |
| MR_cutoff | 0.026 | 6 | 73 | 28 | 69 | 35 | 0.2887 | 0.6759 | 0.7113 | 0.7228 | 0.6635 | 2.00 | -1.00 | 5.00 |
| MR_cutoff | 0.027 | 6 | 73 | 28 | 69 | 35 | 0.2887 | 0.6759 | 0.7113 | 0.7228 | 0.6635 | 2.00 | -1.00 | 5.00 |
| MR_cutoff | 0.028 | 6 | 72 | 27 | 70 | 36 | 0.2784 | 0.6667 | 0.7216 | 0.7273 | 0.6604 | 2.00 | -1.00 | 5.00 |
| MR_cutoff | 0.029 | 6 | 71 | 26 | 71 | 37 | 0.2680 | 0.6574 | 0.7320 | 0.7320 | 0.6574 | 2.00 | -1.00 | 6.00 |
| MR_cutoff | 0.03  | 6 | 70 | 25 | 72 | 38 | 0.2577 | 0.6481 | 0.7423 | 0.7368 | 0.6545 | 2.00 | -1.00 | 6.00 |
| MR_cutoff | 0.031 | 6 | 67 | 25 | 72 | 41 | 0.2577 | 0.6204 | 0.7423 | 0.7283 | 0.6372 | 2.00 | -1.00 | 5.00 |
| MR_cutoff | 0.032 | 6 | 67 | 23 | 74 | 41 | 0.2371 | 0.6204 | 0.7629 | 0.7444 | 0.6435 | 2.00 | -1.00 | 5.00 |
| MR_cutoff | 0.033 | 6 | 65 | 24 | 73 | 43 | 0.2474 | 0.6019 | 0.7526 | 0.7303 | 0.6293 | 2.00 | -1.00 | 5.00 |
| MR_cutoff | 0.034 | 6 | 63 | 19 | 78 | 45 | 0.1959 | 0.5833 | 0.8041 | 0.7683 | 0.6341 | 2.00 | -1.00 | 5.00 |
| MR_cutoff | 0.035 | 6 | 63 | 20 | 77 | 45 | 0.2062 | 0.5833 | 0.7938 | 0.7590 | 0.6311 | 2.00 | -1.00 | 5.00 |
| MR_cutoff | 0.036 | 6 | 63 | 19 | 78 | 45 | 0.1959 | 0.5833 | 0.8041 | 0.7683 | 0.6341 | 2.00 | -1.00 | 5.00 |
| MR_cutoff | 0.037 | 6 | 63 | 19 | 78 | 45 | 0.1959 | 0.5833 | 0.8041 | 0.7683 | 0.6341 | 2.00 | -1.00 | 5.00 |
| MR_cutoff | 0.038 | 6 | 62 | 18 | 79 | 46 | 0.1856 | 0.5741 | 0.8144 | 0.7750 | 0.6320 | 2.00 | -1.00 | 5.00 |
| MR_cutoff | 0.039 | 6 | 62 | 18 | 79 | 46 | 0.1856 | 0.5741 | 0.8144 | 0.7750 | 0.6320 | 2.00 | -1.00 | 5.00 |
| MR_cutoff | 0.04  | 6 | 63 | 19 | 78 | 45 | 0.1959 | 0.5833 | 0.8041 | 0.7683 | 0.6341 | 2.00 | -1.00 | 5.00 |
| MR_cutoff | 0.041 | 6 | 62 | 18 | 79 | 46 | 0.1856 | 0.5741 | 0.8144 | 0.7750 | 0.6320 | 2.00 | -1.00 | 5.00 |
| MR_cutoff | 0.042 | 6 | 61 | 19 | 78 | 47 | 0.1959 | 0.5648 | 0.8041 | 0.7625 | 0.6240 | 2.00 | -1.00 | 5.00 |
| MR_cutoff | 0.043 | 6 | 61 | 18 | 79 | 47 | 0.1856 | 0.5648 | 0.8144 | 0.7722 | 0.6270 | 2.00 | -1.00 | 5.00 |
| MR_cutoff | 0.044 | 6 | 61 | 18 | 79 | 47 | 0.1856 | 0.5648 | 0.8144 | 0.7722 | 0.6270 | 2.00 | -1.00 | 5.00 |
| MR_cutoff | 0.045 | 6 | 61 | 16 | 81 | 47 | 0.1649 | 0.5648 | 0.8351 | 0.7922 | 0.6328 | 2.00 | -1.00 | 5.00 |
| MR_cutoff | 0.046 | 6 | 59 | 16 | 81 | 49 | 0.1649 | 0.5463 | 0.8351 | 0.7867 | 0.6231 | 2.00 | -1.00 | 5.00 |
| MR_cutoff | 0.047 | 6 | 58 | 16 | 81 | 50 | 0.1649 | 0.5370 | 0.8351 | 0.7838 | 0.6183 | 2.00 | -1.00 | 5.00 |
| MR_cutoff | 0.048 | 6 | 57 | 16 | 81 | 51 | 0.1649 | 0.5278 | 0.8351 | 0.7808 | 0.6136 | 2.00 | -1.00 | 5.00 |
| MR_cutoff | 0.049 | 6 | 56 | 16 | 81 | 52 | 0.1649 | 0.5185 | 0.8351 | 0.7778 | 0.6090 | 2.00 | -1.75 | 5.00 |
| MR_cutoff | 0.05  | 6 | 55 | 16 | 81 | 53 | 0.1649 | 0.5093 | 0.8351 | 0.7746 | 0.6045 | 2.00 | -2.00 | 5.00 |

|               |      |   |     |    |    |    |        |        |        |        |        |       |       |       |
|---------------|------|---|-----|----|----|----|--------|--------|--------|--------|--------|-------|-------|-------|
| N_aberrations | 1    | 6 | 107 | 91 | 15 | 2  | 0.8585 | 0.9817 | 0.1415 | 0.5404 | 0.8824 | -3.00 | -6.00 | 0.00  |
| N_aberrations | 2    | 6 | 98  | 56 | 43 | 11 | 0.5657 | 0.8991 | 0.4343 | 0.6364 | 0.7963 | -0.50 | -5.00 | 3.00  |
| N_aberrations | 3    | 6 | 77  | 36 | 61 | 31 | 0.3711 | 0.7130 | 0.6289 | 0.6814 | 0.6630 | 2.00  | -1.00 | 5.00  |
| N_aberrations | 4    | 6 | 58  | 22 | 68 | 49 | 0.2444 | 0.5421 | 0.7556 | 0.7250 | 0.5812 | 3.00  | -0.50 | 6.00  |
| N_aberrations | 5    | 6 | 48  | 13 | 72 | 59 | 0.1529 | 0.4486 | 0.8471 | 0.7869 | 0.5496 | 4.00  | 1.00  | 7.00  |
| N_aberrations | 6    | 6 | 38  | 10 | 71 | 68 | 0.1235 | 0.3585 | 0.8765 | 0.7917 | 0.5108 | 5.00  | 1.50  | 11.00 |
| UCL           | 0.05 | 6 | 107 | 97 | 0  | 1  | 1.0000 | 0.9907 | 0.0000 | 0.5245 | 0.0000 | -5.00 | -8.00 | -1.00 |
| UCL           | 0.1  | 6 | 107 | 97 | 0  | 1  | 1.0000 | 0.9907 | 0.0000 | 0.5245 | 0.0000 | -5.00 | -8.00 | -1.00 |
| UCL           | 0.15 | 6 | 107 | 97 | 0  | 1  | 1.0000 | 0.9907 | 0.0000 | 0.5245 | 0.0000 | -5.00 | -8.00 | -1.00 |
| UCL           | 0.2  | 6 | 107 | 96 | 1  | 1  | 0.9897 | 0.9907 | 0.0103 | 0.5271 | 0.5000 | -4.00 | -7.00 | 0.00  |
| UCL           | 0.25 | 6 | 107 | 94 | 3  | 1  | 0.9691 | 0.9907 | 0.0309 | 0.5323 | 0.7500 | -3.00 | -6.00 | 0.00  |
| UCL           | 0.3  | 6 | 104 | 89 | 8  | 4  | 0.9175 | 0.9630 | 0.0825 | 0.5389 | 0.6667 | -2.00 | -6.00 | 1.00  |
| UCL           | 0.35 | 6 | 102 | 82 | 15 | 6  | 0.8454 | 0.9444 | 0.1546 | 0.5543 | 0.7143 | -2.00 | -5.00 | 1.75  |
| UCL           | 0.4  | 6 | 99  | 76 | 21 | 9  | 0.7835 | 0.9167 | 0.2165 | 0.5657 | 0.7000 | -1.50 | -5.00 | 2.00  |
| UCL           | 0.45 | 6 | 96  | 67 | 30 | 12 | 0.6907 | 0.8889 | 0.3093 | 0.5890 | 0.7143 | -1.00 | -4.00 | 2.00  |
| UCL           | 0.5  | 6 | 95  | 55 | 42 | 13 | 0.5670 | 0.8796 | 0.4330 | 0.6333 | 0.7636 | 0.00  | -3.00 | 3.00  |
| UCL           | 0.55 | 6 | 91  | 44 | 53 | 17 | 0.4536 | 0.8426 | 0.5464 | 0.6741 | 0.7571 | 1.00  | -2.00 | 4.00  |
| UCL           | 0.6  | 6 | 83  | 40 | 57 | 25 | 0.4124 | 0.7685 | 0.5876 | 0.6748 | 0.6951 | 1.00  | -2.00 | 4.00  |
| UCL           | 0.65 | 6 | 77  | 36 | 61 | 31 | 0.3711 | 0.7130 | 0.6289 | 0.6814 | 0.6630 | 2.00  | -1.00 | 5.00  |
| UCL           | 0.7  | 6 | 73  | 28 | 69 | 35 | 0.2887 | 0.6759 | 0.7113 | 0.7228 | 0.6635 | 3.00  | -0.50 | 6.00  |
| UCL           | 0.75 | 6 | 64  | 20 | 77 | 44 | 0.2062 | 0.5926 | 0.7938 | 0.7619 | 0.6364 | 2.00  | -1.00 | 5.00  |
| UCL           | 0.8  | 6 | 53  | 17 | 80 | 55 | 0.1753 | 0.4907 | 0.8247 | 0.7571 | 0.5926 | 2.00  | -1.00 | 5.50  |
| UCL           | 0.85 | 6 | 44  | 13 | 84 | 64 | 0.1340 | 0.4074 | 0.8660 | 0.7719 | 0.5676 | 3.00  | -1.00 | 8.00  |
| UCL           | 0.9  | 6 | 33  | 12 | 85 | 75 | 0.1237 | 0.3056 | 0.8763 | 0.7333 | 0.5313 | 3.00  | -0.75 | 9.50  |
| UCL           | 0.95 | 6 | 27  | 11 | 86 | 81 | 0.1134 | 0.2500 | 0.8866 | 0.7105 | 0.5150 | 3.50  | 1.00  | 8.50  |
